# Supplementary material
Source: PubMed Central journal article supplement (PMC5237408)
Supplement: NIHMS829921-supplement-Supplemental_Materials.pdf [file NIHMS829921-supplement-Supplemental_Materials.pdf]

a

Disease category

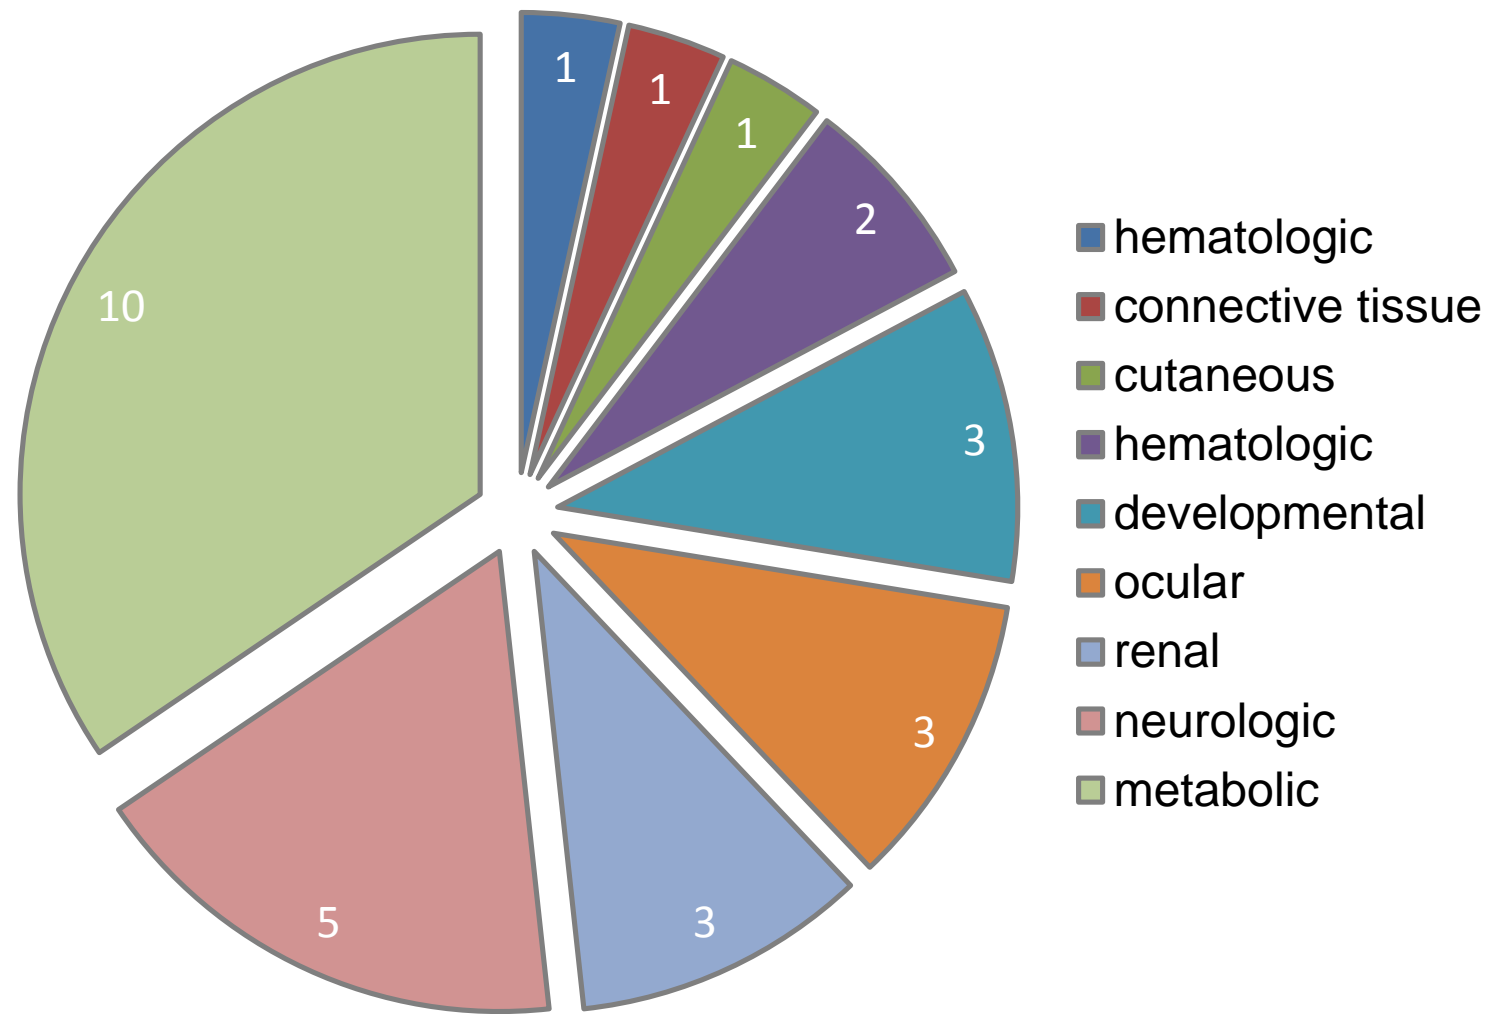

b

Mutation type

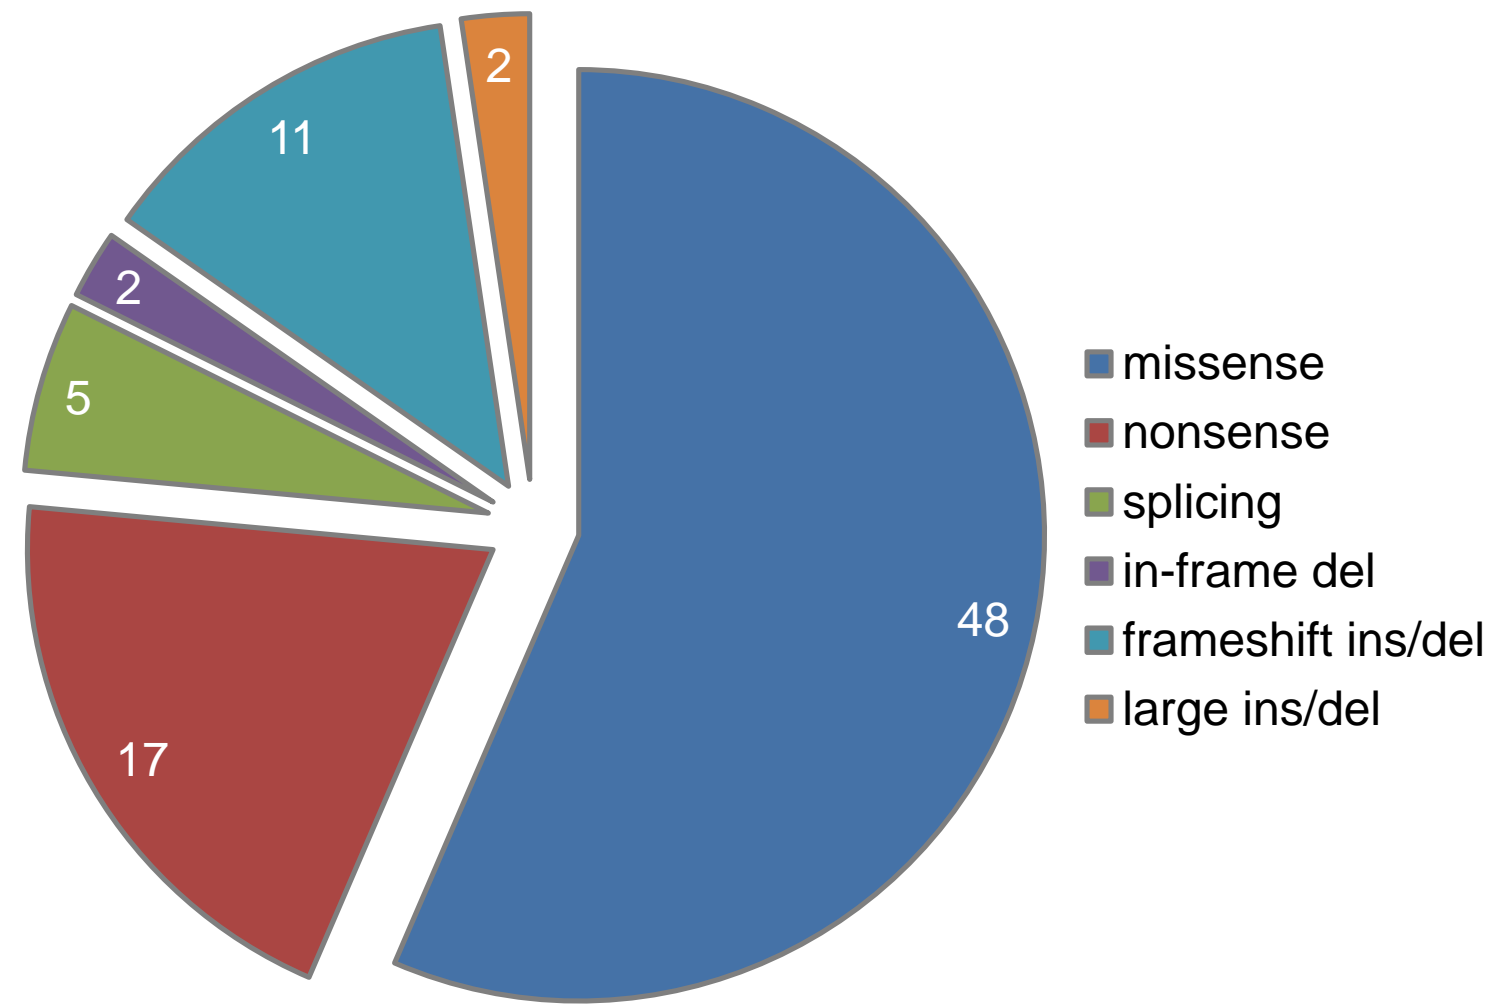

Allele frequency  
in ExAC

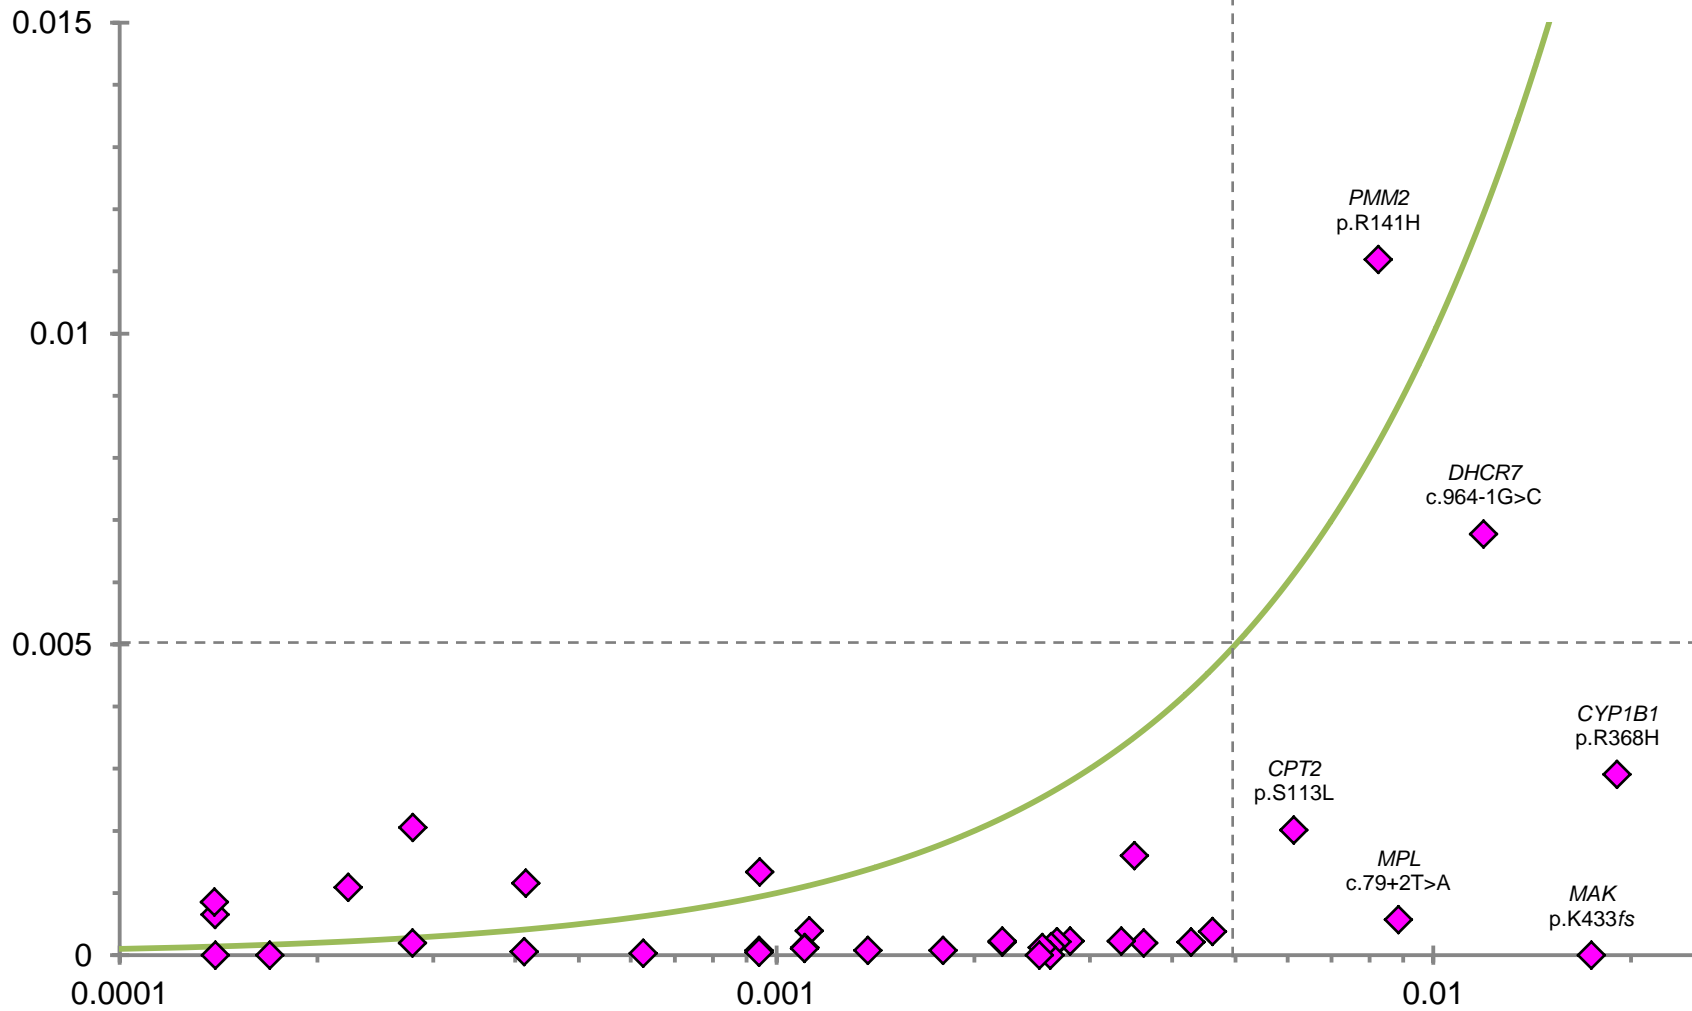

Allele frequency in current AJ population  
(log<sub>10</sub> scale)

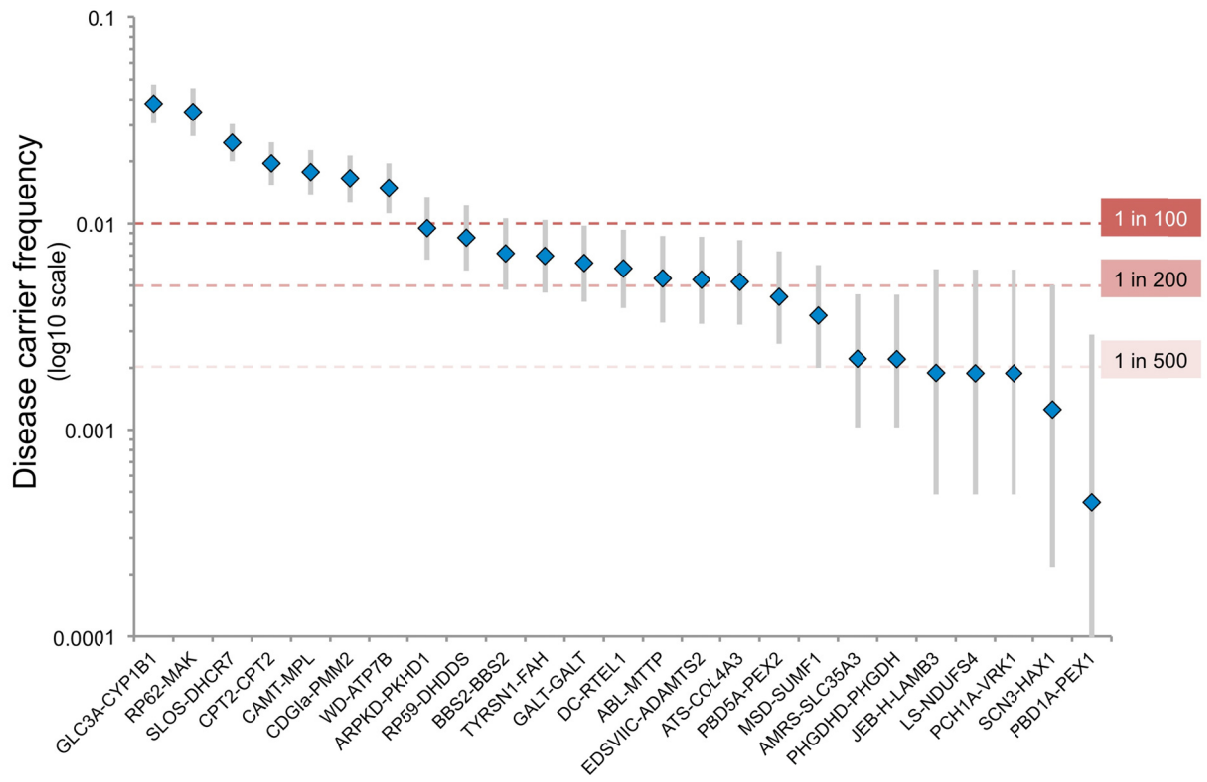

## Clinical Genetics

**Supplementary Table S1: Brief description for 29 conditions that have been tested in current study**

| Disease Name (abbreviation)                                       | OMIM#         | Gene            | Inheritance | Disease category  | Disease description                                                                                                                                                                                                                                                                                                                                                                                                                                                        |
|-------------------------------------------------------------------|---------------|-----------------|-------------|-------------------|----------------------------------------------------------------------------------------------------------------------------------------------------------------------------------------------------------------------------------------------------------------------------------------------------------------------------------------------------------------------------------------------------------------------------------------------------------------------------|
| Abetalipoproteinemia (ABL)                                        | 200100        | <i>MTPP</i>     | AR          | hematologic       | severe malabsorption of dietary fats and fat-soluble vitamins causing failure to thrive, diarrhea, blood abnormalities (acanthocytosis), and stool abnormalities (steatorrhea). Later in childhood symptoms include poor muscle coordination, ataxia, and retinitis pigmentosa.                                                                                                                                                                                            |
| Alport syndrome, autosomal recessive (ATS)                        | 203780        | <i>COL4A3</i>   | AR          | renal             | progressive loss of kidney function (hematuria, proteinuria) resulting in end-stage renal disease, sensorineural hearing loss, and eye abnormalities such as anterior lenticonus.                                                                                                                                                                                                                                                                                          |
| Alport syndrome, X-linked (ATS)                                   | 301050        | <i>COL4A5</i>   | XL-R        | renal             |                                                                                                                                                                                                                                                                                                                                                                                                                                                                            |
| Arthrogryposis, mental retardation, and seizures (AMRS)           | 615553        | <i>SLC35A3</i>  | AR          | neurologic        | arthrogryposis, mental retardation, autism spectrum disorder, epilepsy, microcephaly, and hypotonia.                                                                                                                                                                                                                                                                                                                                                                       |
| Bardet-Biedl syndrome 2 (BBS2)                                    | 209900        | <i>BBS2</i>     | AR          | developmental     | features include retinitis pigmentosa, obesity polydactyly, intellectual disability/ developmental delay, renal problems, anosmia, genital abnormalities, and male infertility. Other affected organs include the heart, liver and digestive system. There is variable age of onset and severity of symptoms.                                                                                                                                                              |
| Carnitine palmitoyltransferase II deficiency (CPT2)               | 255110;608836 | <i>CPT2</i>     | AR          | metabolic         | characterized by recurrent episodes of myalgia and rhabdomyolysis causing myoglobinuria which may be triggered by exercise, stress, exposure to extreme temperatures, infections, or fasting. The first episode usually occurs during childhood or adolescence. This can damage the kidneys, in some cases leading to life-threatening kidney failure.                                                                                                                     |
| Congenital amegakaryocytic thrombocytopenia (CAMT)                | 604498        | <i>MPL</i>      | AR          | hematologic       | pancytopenia, decreased bone marrow activity, and very low platelet counts.                                                                                                                                                                                                                                                                                                                                                                                                |
| Congenital disorder of glycosylation Ia (CDG1A)                   | 212065        | <i>PMM2</i>     | AR          | metabolic         | hypotonia, abnormal fat distribution, strabismus, developmental delay, and failure to thrive appear in infancy. Other symptoms include elevated liver function tests, seizures, and pericardial effusion that could lead to death under 1 year of life due to multiple organ failure. Affected individuals who survive infancy may have intellectual disability, lethargy, temporary paralysis, neuropathy, kyphoscoliosis, ataxia, contractures and retinitis pigmentosa. |
| Congenital hydrocephalus (HYC1)                                   | 236600        | <i>CCDC88C</i>  | AR          | neurologic        | enlarged ventricles due to a disturbance of cerebrospinal fluid accumulation, onset in utero, moderate to severe intellectual disability                                                                                                                                                                                                                                                                                                                                   |
| Dyskeratosis congenita, autosomal recessive (DC)                  | 615190        | <i>RTEL1</i>    | AR          | developmental     | abnormally growing and poorly growing fingernails and toenails, pigmentary changes on neck and chest. Symptoms include bone marrow failure, aplastic anemia and increased risk for leukemia. Increased risk for cancers of the head, neck, anus, or genitals. Other features include pulmonary fibrosis, hair loss, osteoporosis, avascular necrosis of the joints, liver disease and short stature.                                                                       |
| Ehlers-Danlos syndrome, type VIIC (EDSVIIC)                       | 225410        | <i>ADAMTS2</i>  | AR          | connective tissue | hypermobility, easy bruising, fragile skin, and blue sclera.                                                                                                                                                                                                                                                                                                                                                                                                               |
| Galactosemia (GALT)                                               | 230400        | <i>GALT</i>     | AR          | metabolic         | feeding difficulties, lethargy, failure to thrive, jaundice, and bleeding within a few days after birth. Increased risk for sepsis and shock, developmental delay/intellectual disability, and cataracts. Managed by dietary restrictions.                                                                                                                                                                                                                                 |
| Hyperornithinemia-hyperammonemia-homocitrullinemia syndrome (HHH) | 238970        | <i>SLC25A15</i> | AR          | metabolic         | neonatal to infantile onset, manifestations result from hyperammonemia, including chronic neurocognitive deficits, acute encephalopathy and liver dysfunction                                                                                                                                                                                                                                                                                                              |
| Junctional epidermolysis bullosa, Herlitz type (JEB-H)            | 226700        | <i>LAMB3</i>    | AR          | cutaneous         | severe blistering presented at birth and may lead to significant granulation tissue. Mucosal involvement of the mouth, upper respiratory tract, esophagus, bladder, urethra, and corneas is also common. Renal and ureteral anomalies that can be seen.                                                                                                                                                                                                                    |
| Leigh syndrome (LS)                                               | 256000        | <i>NDUFS4</i>   | AR          | neurologic        | characterized by onset of symptoms typically between age three and 12 months, often following a viral infection. Decompensation during an intercurrent illness is typically associated with psychomotor retardation or regression.                                                                                                                                                                                                                                         |
| Leigh syndrome (LS)                                               | 252010        | <i>NDUFAF5</i>  | AR          | neurologic        | Neurologic features include hypotonia, spasticity, movement disorders, cerebellar ataxia, and peripheral neuropathy. Extraneurologic manifestations may include hypertrophic cardiomyopathy. High mortality rate by age three years, most often as a result of respiratory or cardiac failure.                                                                                                                                                                             |
| Multiple sulfatase deficiency (MSD)                               | 272200        | <i>SUMF1</i>    | AR          | metabolic         | accumulation of sulfatides, sulfateglycosaminoglycans, sphingolipids, and steroid sulfates causing neurologic deterioration with mental retardation, skeletal anomalies, organomegaly, and ichthyosis                                                                                                                                                                                                                                                                      |
| Severe congenital neutropenia, autosomal recessive (SCN3)         | 610738        | <i>HAX1</i>     | AR          | hematologic       | neutrophils deficiency at birth or soon after, recurrent infections, fevers, gingivitis. The disease is also associated with osteopenia and increased risk for leukemia or myelodysplastic syndrom.                                                                                                                                                                                                                                                                        |
| 3-Phosphoglycerate dehydrogenase deficiency (PHGDHD)              | 601815        | <i>PHGDH</i>    | AR          | metabolic         | microcephaly, psychomotor retardation, and seizures                                                                                                                                                                                                                                                                                                                                                                                                                        |
| Polycystic kidney disease, autosomal recessive (ARPKD)            | 263200        | <i>PKHD1</i>    | AR          | renal             | cyst development in the kidneys causes kidney enlargement and can lead to kidney failure. Symptoms include cysts in the liver, hypertension, hematuria, recurrent urinary tract infections, kidney stones, and an increased risk for aneurysms. This condition is often lethal early in life.                                                                                                                                                                              |
| Pontocerebellar hypoplasia type 1A (PCH1A)                        | 607596        | <i>VRK1</i>     | AR          | neurologic        | severe neurodegenerative disorders affecting growth and function of the brainstem and cerebellum, resulting in little or no development, central and peripheral motor dysfunction associated with anterior horn cell degeneration resembling infantile spinal muscular atrophy                                                                                                                                                                                             |
| Primary Congenital Glaucoma (GLC3A)                               | 231300        | <i>CYP11B1</i>  | AR          | ocular            | characterized by elevated intraocular pressure, enlargement of the globe, edema, and opacification of the cornea with rupture of Descemet's membrane, thinning of the anterior sclera and iris atrophy, anomalously deep anterior chamber, and structurally normal posterior segment except for progressive glaucomatous optic atrophy. Symptoms usually occur in the first year of life.                                                                                  |
| Retinitis Pigmentosa (RP59)                                       | 613861        | <i>DHDDS</i>    | AR          | ocular            | childhood loss of night vision developing into peripheral blind spots and, later, leading to tunnel vision and blindness.                                                                                                                                                                                                                                                                                                                                                  |
| Retinitis Pigmentosa (RP62)                                       | 614181        | <i>MAK</i>      | AR          | ocular            | late-onset progressive, visual acuity is preserved but visual fields is severely affected.                                                                                                                                                                                                                                                                                                                                                                                 |

## Clinical Genetics

|                                           |        |              |    |               |                                                                                                                                                                                                                                                                               |
|-------------------------------------------|--------|--------------|----|---------------|-------------------------------------------------------------------------------------------------------------------------------------------------------------------------------------------------------------------------------------------------------------------------------|
| Smith-Lemli-Opitz syndrome (SLOS)         | 270400 | <i>DHCR7</i> | AR | developmental | characteristic facial features, microcephaly, intellectual disability, and behavioral problems (e.g. autism). Abnormalities of the heart, lungs, kidneys, gastrointestinal tract, fingers/toes and genitalia are also common. Variable severity of symptoms.                  |
| Tyrosinemia type 1 (TYRSN1)               | 276700 | <i>FAH</i>   | AR | metabolic     | tyrosine aminotransferase deficiency that can affect the eyes, skin, and mental development. Symptoms include photophobia, painful skin lesions on the palms and soles, and intellectual disability.                                                                          |
| Wilson Disease (WD)                       | 277900 | <i>ATP7B</i> | AR | metabolic     | copper accumulation in the liver (causing jaundice, fatigue, loss of appetite, and abdominal swelling), brain (causing nervous system and psychiatric problems), and eyes (causing Kayser-Fleischer rings and restricted ability to gaze upwards) with variable age of onset. |
| Peroxisome biogenesis disorder 1A (PBD1A) | 214100 | <i>PEX1</i>  | AR | metabolic     | demyelination of white matter causing hypotonia, feeding problems, hearing loss, vision loss, and seizures. Other affected organs include the liver, heart, kidneys, and bones and there is a shortened life expectancy.                                                      |
| Peroxisome biogenesis disorder 5A (PBD5A) | 614866 | <i>PEX2</i>  | AR | metabolic     |                                                                                                                                                                                                                                                                               |

## Clinical Genetics

**Supplementary Table S2: 85 Candidate variants screened in current study and inclusion reasons**

| Disease <sup>a</sup> -gene | Chromosome location | Mutation nomenclature               |                                    | Evidence <sup>b</sup> | Reference (PMID)  |
|----------------------------|---------------------|-------------------------------------|------------------------------------|-----------------------|-------------------|
|                            |                     | cDNA                                | Protein                            |                       |                   |
| ABL- <i>MTTP</i>           | 4q24                | c.2593G>T                           | p.G865*                            | AJ;FD                 | 17275380          |
|                            |                     | c.2212delT                          | p.S738fs                           | AJ                    | 17275380          |
| ATS-COL4A3                 | 2q36.3              | c.40_63del                          | p.L14_L21del                       | AJ;FQ;FD              | 23927549          |
| ATS-COL4A5                 | Xq22                | c.5030G>A                           | p.R1677Q                           | AJ;FD                 | 9150741           |
| AMRS-SLC35A3               | 1p21                | c.886A>G                            | p.S296G                            | AJ;FD;FQ              | 24031089          |
|                            |                     | c.514C>T                            | p.Q172*                            | AJ;FD                 | 24031089          |
| BBS2-BBS2                  | 16q12.2             | c.311A>C                            | p.D104A                            | AJ;FQ                 | 23829372          |
|                            |                     | c.1895G>C                           | p.R632P                            | AJ;FQ                 | 23829372          |
| CPT2-CPT2                  | 1p32                | c.338C>T                            | p.S113L                            | AJ                    | 10090476          |
|                            |                     | c.1239_1240delGA                    | p.Q413fs                           | AJ                    | 10090476;11477613 |
|                            |                     | c.370C>T                            | p.R124*                            | RC                    | 9562964           |
|                            |                     | c.110_111dupGC                      | p.S38fs                            | AJ                    | 12410208          |
| CAMT-MPL                   | 1p34.2              | c.79+2T>A                           |                                    | AJ;FQ;FD              | 21489838          |
| CDG1A-PMM2                 | 16p13.2             | c.338C>T                            | p.P113L                            | RC                    | 9140401           |
|                            |                     | c.357C>A                            | p.F119L                            | RC                    | 9140401           |
|                            |                     | c.422G>A                            | p.R141H                            | RC                    | 9140401           |
|                            |                     | c.691G>A                            | p.V231M                            | RC                    | 9140401           |
| HYC1-CCDC88C               | 14q32.1             | c.934C>T                            | p.R312*                            | AJ                    | 23042809          |
| DC- <i>RTEL1</i>           | 20q13.3             | c.3791G>A (uc021wge.1) <sup>c</sup> | p.R1264H (uc021wge.1) <sup>c</sup> | AJ;FQ;FD              | 24009516          |
|                            |                     | c.1548G>T                           | p.M516I                            | AJ                    | 23959892          |
|                            |                     | c.2941C>T                           | p.R981W                            | RC                    | 23453664          |
|                            |                     | c.2992C>T                           | p.R998*                            | AJ                    | 23959892          |
|                            |                     | c.2288G>T                           | p.G763V                            | AJ                    | 23453664          |
| EDSVIIC-ADAMTS2            | 5q35.3              | c.673C>T                            | p.Q225*                            | AJ                    | 18973246          |
|                            |                     | c.2384G>A                           | p.W795*                            | AJ                    | 10417273          |
| GALT-GALT                  | 9p13.3              | c.-1039_+789del5573ins129           |                                    | AJ;FQ                 | 21059483          |
|                            |                     | c.253-2A>G                          |                                    | RC                    | 11754113          |
|                            |                     | c.404C>T                            | p.S135L                            | RC                    | 11754113          |
|                            |                     | c.563A>G                            | p.Q188R                            | RC                    | 11754113          |

### Clinical Genetics

|                      |         |                      |           |          |                   |
|----------------------|---------|----------------------|-----------|----------|-------------------|
|                      |         | c.413C>T             | p.T138M   | RC       | 11754113          |
|                      |         | c.512T>C             | p.F171S   | RC       | 9635294           |
|                      |         | c.584T>C             | p.L195P   | RC       | 1373122           |
|                      |         | c.626A>G             | p.Y209C   | RC       | 10408771          |
|                      |         | c.855G>T             | p.K285N   | RC       | 11754113          |
| HHH- <i>SLC25A15</i> | 13q14.1 | c.562_564delTTC      | p.F188del | AJ,RC    | 2013 ACMG meeting |
| JEB-H- <i>LAMB3</i>  | 1q32.2  | c.2528delA           | p.N843fs  | AJ       | 16439963          |
|                      |         | c.124C>T             | p.R42*    | AJ       | 16439963          |
|                      |         | c.1903C>T            | p.R635*   | RC       | 8824879           |
|                      |         | c.727C>T             | p.Q243*   | RC       | 11023379          |
| LS- <i>NDUFS4</i>    | 5q11.2  | c.462delA            | p.K154fs  | AJ;FQ    | 19107570          |
|                      |         | c.355G>C             | p.D119H   | AJ       | 19364667          |
| LS- <i>NDUFAF5</i>   | 20p12.1 | c.749G>T             | p.G250V   | AJ       | 21607760          |
| MSD- <i>SUMF1</i>    | 3p26.1  | c.463T>C             | p.S155P   | AJ;RC    | unpublished data  |
| SCN3- <i>HAX1</i>    | 1q21.3  | c.125dupG            | p.S43fs   | AJ;FD    | 19036076          |
| PHGDHD- <i>PHGDH</i> | 1p12    | c.1468G>A            | p.V490M   | AJ;FQ    | 11751922          |
| ARPKD- <i>PKHD1</i>  | 6p12.2  | c.3761_3762delCCinsG | p.A1254fs | AJ       | unpublished data  |
|                      |         | c.107C>T             | p.T36M    | RC       | 12506140          |
|                      |         | c.1486C>T            | p.R496*   | RC       | 12506140          |
|                      |         | c.5895dupA           | p.L1966fs | RC       | 19914852          |
|                      |         | c.10412T>G           | p.V3471G  | RC       | 12506140          |
|                      |         | c.9689delA           | p.D3230fs | RC       | 19940839          |
| PCH1A- <i>VRK1</i>   | 14q32.2 | c.1072C>T            | p.R358*   | AJ;FD;FQ | 19646678          |
| GLC3A- <i>CYP1B1</i> | 2p22.2  | c.1103G>A            | p.R368H   | AJ       | 21168818          |
| RP59- <i>DHDDS</i>   | 1p36.11 | c.124A>G             | p.K42E    | AJ;FD;FQ | 21295282          |
| RP62- <i>MAK</i>     | 6p24    | c.1297ins(Alu)       | p.K433fs  | AJ;FD;FQ | 22110072          |
|                      |         | c.497G>A             | p.R166H   | AJ       | 21835304          |
| SLOS- <i>DHCR7</i>   | 11q13.4 | c.964-1G>C           |           | AJ;RC    | 15776424          |
|                      |         | c.452G>A             | p.W151*   | RC       | 9653161           |
|                      |         | c.453G>A             | p.W151*   | RC       | 17965227          |
|                      |         | c.1A>G               | p.M1V     | AJ       | 15776424          |
|                      |         | c.976G>T             | p.V326L   | RC       | 17965227          |

## Clinical Genetics

|            |         |             |          |       |          |
|------------|---------|-------------|----------|-------|----------|
|            |         | c.278C>T    | p.T93M   | RC    | 17965227 |
|            |         | c.1055G>A   | p.R352Q  | RC    | 10677299 |
|            |         | c.1054C>T   | p.R352W  | RC    | 17965227 |
|            |         | c.1210C>T   | p.R404C  | RC    | 10677299 |
|            |         | c.506C>T    | p.S169L  | RC    | 10677299 |
|            |         | c.724C>T    | p.R242C  | RC    | 10677299 |
|            |         | c.725G>A    | p.R242H  | RC    | 17965227 |
|            |         | c.906C>G    | p.F302L  | RC    | 17965227 |
|            |         | c.1228G>A   | p.G410S  | RC    | 17965227 |
|            |         | c.1342G>A   | p.E448K  | RC    | 10602371 |
| TYRSN1-FAH | 15q25.1 | c.782C>T    | p.P261L  | AJ    | 11754109 |
|            |         | c.554-1G>T  |          | RC    | 11754109 |
|            |         | c.1062+5G>A |          | RC    | 8829657  |
|            |         | c.192G>T    | p.Q64H   | RC    | 7942842  |
|            |         | c.786G>A    | p.W262*  | RC    | 8829657  |
|            |         | c.1069G>T   | p.E357*  | RC    | 8829657  |
| WD-ATP7B   | 13q14.3 | c.3191A>C   | p.E1064A | AJ    | 9482578  |
|            |         | c.3207C>A   | p.H1069Q | AJ    | 9482578  |
|            |         | c.2333G>T   | p.R778L  | RC    | 7626145  |
|            |         | c.1934T>G   | p.M645R  | AJ    | 9482578  |
| PBD1A-PEX1 | 7q21.2  | c.2528G>A   | p.G843D  | RC    | 11389485 |
|            | 7q21.2  | c.2097dupT  | p.I700fs | RC    | 11389485 |
|            | 7q21.2  | c.2916delA  | p.G983fs | RC    | 21031596 |
| PBD5A-PEX2 | 8q21.11 | c.355C>T    | p.R119*  | AJ;FQ | 23590336 |

<sup>a</sup>See Supplementary Table S1 for disease abbreviations. <sup>b</sup>Evidence code: AJ, reported in Ashkenazi Jewish individual(s); FD, founder effected suggested; FQ, population frequency available; RC, recurrent in other ethnic group(s). <sup>c</sup>cDNA and protein coding number based on the transcript isoform uc021wge.1.



## Clinical Genetics

**Supplementary Table S3: PCR primer information for mutations screened by Luminex assay**

| Disease-gene    | Mutation           | PCR primer sequence (5' to 3') |                                | Primer working concentration (μM) | Amplicon size (bp) |     |
|-----------------|--------------------|--------------------------------|--------------------------------|-----------------------------------|--------------------|-----|
|                 |                    | Forward                        | Reverse                        |                                   |                    |     |
| ABL-MTTP        | p.G865*            | AGCCTTTGACACTCATATCCTTTCTCA    | CAGAGAGCAAGTACTTAGTCATGCCACA   | 1.5                               | 384                |     |
|                 | p.S738fs           | TTTTCAACGGATACAGTGATTTGAT      | CTCCAATTAAGGCACCTTATTAATCATC   | 1.5                               | 319                |     |
| AS-COL4A5       | p.R1677Q           | GGATCTGATTGTCTTATTTCTTATTTCC   | AGGTACATCTGAATCTTCATGGTTACTA   | 1.5                               | 282                |     |
| CPT2-CPT2       | p.S113L            | TTTTCCTAATCATTCAATTTAAGAAGGT   | AGGAGAGAATATGCCTTACTTTTCATT    | 5.0                               | 389                |     |
|                 | p.Q413fs           | GCAGTGTTCTGTCTCTGCCTAGAT       | AGTCAATAGTGAGGGTTTTTCATGGT     | 1.5                               | 373                |     |
| CAMT-MPL        | c.79+2T>A          | CCTGAAGGGGAGGATGGGCTA          | GAGCCTCTTACTCTACCTCCCC         | 1.5                               | 221                |     |
| EDSVIIC-ADAMTS2 | p.Q225*            | TCATCGAACCCTTGGAGAAGGGGCTGG    | GGAGAGCTGCCTGAGTCTCTGGGATGC    | 1.5                               | 210                |     |
|                 | p.W795*            | AGCCGTCAAGAACCTGGAGACAGGCA     | CAGCCCTGCTTGGACTIONACCAGAACG   | 1.5                               | 188                |     |
| JEB-H-LAMB3     | p.N843fs           | ACTTTAGTGTAAGTGGAACTCTGACT     | CTTTGGGTAGCCTCTTTAACACC        | 1.5                               | 329                |     |
|                 | p.R42*             | CCAAGTACATTCTAAGTATTCAGTGGAC   | AAGGATATAATCTTGCTAATGTCAGCTT   | 1.5                               | 349                |     |
|                 | p.R635*            | TAATGCACTGTACAAGTAAAGGAAGGA    | ACCAGTGCCAGCGAGGCTAC           | 1.5                               | 380                |     |
|                 | p.Q243*            | TAAATACCCAAGTCTTAGATTTAGTGC    | CTAACTTCCTTTCTTTATTTTCCATTCT   | 1.5                               | 373                |     |
| LS-NDUFS4       | p.K154fs           | CTTTTCAGGTATCCTCTTTAATTCTGTT   | TATTCACAGTCAAGCAGAGATATAGTCA   | 1.5                               | 200                |     |
|                 | p.D119H            | ATTTAACACAGAAAAAGGTATTCCTCACT  | AAACCACTGGATTAGATAACAATGAAAC   | 4.0                               | 377                |     |
| LS-NDUFAF5      | p.G250V            | CACAAATGCAGGATATTTAATCAGC      | CTACCTTTCCCAATGGAGTCTAAA       | 2.0                               | 210                |     |
| SCN3-HAX1       | p.S43fs            | AGCCATTGTATTAATGTTTTGATGTG     | TACTAGGTCATCAAAGCCGAAGTTAT     | 1.5                               | 358                |     |
| PHGDHD-PHGDH    | p.V490M            | ATCACAAAAGCTTTGAACTTCTGATT     | GATTTTCTCTCCCTATTGATCACAGT     | 5.0                               | 327                |     |
| ARPKD-PKHD1     | p.A1254fs          | GCTATTTGTGATTTCTCCTTGCAT       | AATATTTTGCTTTCCGTATTCTACTTTT   | 1.5                               | 341                |     |
|                 | p.T36M             | ACTATGCTACACACTTCCATATCATCTC   | AAATATTGCTTAAAATATTGCAGAAGGT   | 4.0                               | 442                |     |
|                 | p.R496*            | AATCTCAGGAATAAGACATCACATTTTT   | TACTACCTGGAAGCAGAGCATCAT       | 1.5                               | 346                |     |
|                 | p.L1966fs          | CTGAGGATAAATTGCAACTAAGTTCTG    | ATACTTATACTATCCCGCCCAAAAAC     | 4.0                               | 403                |     |
|                 | p.D3230fs          | AGAAATTATAAACTACCATTGTGGCTATC  | TGGAGATAGAGAACATTACTCTGGTAGA   | 1.5                               | 498                |     |
|                 | p.V3471G           | AAGAGGTTATCCATGATGTTGAAATAGT   | CTTGTTTTGCTTCTTTTCTTTTATAGGT   | 1.5                               | 498                |     |
|                 | PCH1A-VRK1         | p.R358*                        | CATCCATTCCTTTAGGTACTIONACTATCC | CCTCCTCTGTCTGTGTGTTTGA            | 1.5                | 251 |
|                 | RP59-DHDDS         | p.K42E                         | TACTGAGTTAAAAGCACAAAGTACCC     | GGTTTTCTAGCTATAATCTACCTCTCCA      | 1.5                | 327 |
| RP62-MAK        | p.R166H            | AAAAGTTATAGCAACTTAGGGACAAGAG   | GGGAACATGTGTTGTGTCCTATTAT      | 1.5                               | 389                |     |
| SLOS-DHCR7      | c.964-1G>C         | GATGTGTAGGAGCACTCGATGAC        | AGGTAGAAGGCAGGTAGAGTTACTCATT   | 1.5                               | 393                |     |
|                 | p.W151* (c.452G>A) | GTGAAGTTTGCACCTTTCTACATCAG     | TATAGGGGCCCTCAGAGATGGT         | 1.5                               | 424                |     |
|                 | p.W151* (c.453G>A) | GTGAAGTTTGCACCTTTCTACATCAG     | TATAGGGGCCCTCAGAGATGGT         | 1.5                               | 424                |     |
|                 | p.M1V              | CTCTGAGACCACACTTTACTTTCTAGC    | CAAGGAAGAGAGTCTAAGACAAGATGAT   | 1.5                               | 340                |     |
|                 | p.V326L            | GATGTGTAGGAGCACTCGATGAC        | AGGTAGAAGGCAGGTAGAGTTACTCATT   | 1.5                               | 393                |     |
| TYRSN1-FAH      | p.T93M             | CTTACAGCTGAGGATGAATCTGAAC      | GGAGGTGGACTGGTTTTCACT          | 1.5                               | 401                |     |
|                 | p.P261L            | CTGATCAGCCTTTGTAAGTCCTG        | AGCTTCCCTCCTGATGGTCT           | 1.5                               | 281                |     |

## Clinical Genetics

**Supplementary Table S4: ASPE primer information for mutations screened by Luminex assay**

| Disease-gene            | Mutation           | ASPE primer (5' to 3')                | Bead Tag ID | Primer working concentration (µM) |
|-------------------------|--------------------|---------------------------------------|-------------|-----------------------------------|
| ABL- <i>MTTP</i>        | p.G865*            | WT: GATGGAGCGGGAATTCACATCC            | LUA_10      | 0.25                              |
|                         |                    | MUT: GATGGAGCGGGAATTCACATCA           | LUA_28      | 0.25                              |
| AS-COL4A5               | p.S738fs           | WT: TGAAAGGACTTATTCTGCTAATAGATCATT    | MTAG-B049   | 0.25                              |
|                         |                    | MUT: TGAAAGGACTTATTCTGCTAATAGATCATC   | MTAG-A026   | 0.25                              |
|                         |                    | WT: ACTTGAGGACACGAATTAGCCG            | MTAG-B098   | 0.25                              |
| CPT2- <i>CPT2</i>       | p.S113L            | MUT: ACTTGAGGACACGAATTAGCCA           | MTAG-A019   | 0.25                              |
|                         |                    | WT: AGCCCAGCCTACCTACCCG               | MTAG-A063   | 0.25                              |
| CAMT- <i>MPL</i>        | p.Q413fs           | MUT: AGCCCAGCCTACCTACCCA              | MTAG-A039   | 0.25                              |
|                         |                    | WT: TCAGTCAGCTCGAAGTTGAGTTTCT         | MTAG-B095   | 0.25                              |
|                         |                    | MUT: TCAGTCAGCTCGAAGTTGAGTTTGC        | MTAG-A054   | 0.25                              |
| EDSVIIC- <i>ADAMTS2</i> | p.Q225*            | WT: CCAAGTCAGCAGCCAAGGT               | MTAG-A037   | 0.25                              |
|                         |                    | MUT: CCAAGTCAGCAGCCAAGGA              | MTAG-A053   | 0.25                              |
| JEB-H- <i>LAMB3</i>     | p.N843fs           | WT: TCACCTGTGTCCAGGGCCTG              | LUA_24      | 0.25                              |
|                         |                    | MUT: TCACCTGTGTCCAGGGCCTA             | LUA_37      | 0.25                              |
|                         |                    | WT: ATTGCCATGGGCGTGGAGTG              | LUA_29      | 0.25                              |
| LS- <i>NDUFS4</i>       | p.D119H            | MUT: ATTGCCATGGGCGTGGAGTA             | LUA_59      | 0.25                              |
|                         |                    | WT: CTGAGCAGCTGCGGGGCTTCAA            | MTAG-A039   | 0.25                              |
|                         |                    | MUT: CTGAGCAGCTGCGGGGCTTCAAT          | MTAG-A074   | 0.25                              |
|                         |                    | WT: TTGGGAGGACCCGGTTTCTCC             | MTAG-A028   | 0.25                              |
| SCN3- <i>HAX1</i>       | p.S43fs            | MUT: TTGGGAGGACCCGGTTTCTCT            | MTAG-A027   | 0.25                              |
|                         |                    | WT: GGCTGCTGAGAAGTCTCG                | MTAG-A012   | 0.25                              |
|                         |                    | MUT: GGCTGCTGAGAAGTCTCA               | MTAG-A057   | 0.25                              |
|                         |                    | WT: AGCGCCTACTATGCTGTGTCCC            | MTAG-A054   | 0.25                              |
| PHGDHD- <i>PHGDH</i>    | p.V490M            | MUT: AGCGCCTACTATGCTGTGTCCCT          | MTAG-A072   | 0.25                              |
|                         |                    | WT: GACATTGAAGAGAGGAAGGTTCCAAAA       | MTAG-A048   | 0.25                              |
|                         |                    | MUT: GACATTGAAGAGAGGAAGGTTCCAAAC      | MTAG-A045   | 0.25                              |
|                         |                    | WT: GGTTAGAACCATGTTGGATAAGGGATC       | MTAG-B080   | 0.25                              |
| ARPKD- <i>PKHD1</i>     | p.A1254fs          | MUT: GGTTAGAACCATGTTGGATAAGGGATG      | MTAG-B097   | 0.25                              |
|                         |                    | WT: CACTGATGAAATTCAGTTAACTATCCTGG     | MTAG-A078   | 0.25                              |
|                         |                    | MUT: CACTGATGAAATTCAGTTAACTATCCTGT    | MTAG-A075   | 0.25                              |
|                         |                    | WT: AGGAAGAAGAAGAAGAAGGGGGC           | MTAG-A077   | 0.25                              |
| PCH1A- <i>VRK1</i>      | p.R358*            | MUT: AAGATGATGATGAGGAAGAAGAAGAAGGGGGG | MTAG-A019   | 0.25                              |
|                         |                    | WT: TCCTGGCAGAGGCAGGCG                | MTAG-A064   | 0.25                              |
|                         |                    | MUT: TCCTGGCAGAGGCAGGCA               | MTAG-A073   | 0.25                              |
|                         |                    | WT: GCATCGGGTATCTGGGGGG               | MTAG-A051   | 0.25                              |
| RP59- <i>DHDDS</i>      | p.K42E             | MUT: GCATCGGGTATCTGGGGCC              | MTAG-A052   | 0.25                              |
|                         |                    | WT: CCATCAAAAATGACTGTGATCCACG         | MTAG-A025   | 0.25                              |
|                         |                    | MUT: CCATCAAAAATGACTGTGATCCACA        | MTAG-A015   | 0.25                              |
|                         |                    | WT: AGAAGCACCAGATCCGAGTCT             | MTAG-A022   | 0.25                              |
| RP62- <i>MAK</i>        | p.R166H            | MUT: AGAAGCACCAGATCCGAGTCT            | MTAG-A062   | 0.25                              |
|                         |                    | WT: CTTACACACCTTTAATGTGCAGTA          | MTAG-A055   | 0.25                              |
|                         |                    | MUT: CTTACACACCTTTAATGTGCAGTT         | MTAG-A066   | 0.25                              |
|                         |                    | WT: GCACTCAGCCAACCTTGACATCAACAGA      | MTAG-A053   | 0.25                              |
| SLOS- <i>DHCR7</i>      | p.W151* (c.452G>A) | MUT: GCACTCAGCCAACCTTGACATCAACAGT     | MTAG-A037   | 0.25                              |
|                         |                    | WT: CCCATCAGGCAAATCACCAAAGT           | MTAG-A067   | 0.25                              |
|                         |                    | MUT: CCCATCAGGCAAATCACCAAAGG          | MTAG-A065   | 0.25                              |
|                         |                    | WT: GGTTCCCTTGCTTTCTTCAATTTCTTTCTTCG  | MTAG-A043   | 0.25                              |
| TYRSN1- <i>FAH</i>      | p.P261L            | MUT: GGTTCCCTTGCTTTCTTCAATTTCTTTCTTCA | MTAG-A044   | 0.25                              |
|                         |                    | WT: GGAACCGTCGCTATGCCAAGA             | MTAG-B097   | 0.25                              |
|                         |                    | MUT: GGAACCGTCGCTATGCCAAGG            | MTAG-A078   | 0.25                              |
|                         |                    | WT: CTGAAGATCTCAGTAAAACCTCAGGGGCAC    | MTAG-A067   | 0.25                              |
| SLOS- <i>DHCR7</i>      | p.W151* (c.453G>A) | MUT: CTGAAGATCTCAGTAAAACCTCAGGGGCAT   | MTAG-A063   | 0.25                              |
|                         |                    | WT: TTCCCCCTCGCCCCCAG                 | MTAG-A044   | 0.25                              |
|                         |                    | MUT: TTCCCCCTCGCCCCCAG                | MTAG-A043   | 0.25                              |
|                         |                    | WT: TATCAGATCAACGGCCTGCAAGCCTG        | MTAG-A048   | 0.25                              |
| SLOS- <i>DHCR7</i>      | p.W151* (c.453G>A) | MUT: TATCAGATCAACGGCCTGCAAGCCTA       | MTAG-A036   | 0.25                              |
|                         |                    | WT: AGAGCAGGTGCGTGAGGAGC              | MTAG-B087   | 0.25                              |
|                         |                    | MUT: GCAAACCAGAGCAGGTGCGTGAGGAGT      | MTAG-A022   | 0.25                              |
|                         |                    | WT: GTTCTCTTTCTTGCAGGGCCCAA           | MTAG-A051   | 0.25                              |
| SLOS- <i>DHCR7</i>      | p.V326L            | MUT: GTTCTCTTTCTTGCAGGGCCCAA          | MTAG-A095   | 0.25                              |
|                         |                    | WT: ACAGCTGCACGGGTGGTACAC             | MTAG-A075   | 0.25                              |
|                         |                    | MUT: ACAGCTGCACGGGTGGTACAA            | MTAG-A061   | 0.25                              |
|                         |                    | WT: ATCTGGGCCAAGACTCCACCTATAAC        | MTAG-A077   | 0.25                              |
| SLOS- <i>DHCR7</i>      | p.M1V              | MUT: ATCTGGGCCAAGACTCCACCTATAAT       | MTAG-B082   | 0.25                              |
|                         |                    | WT: AAGAGTTTTGGGACCACTGTCTCTCC        | MTAG-A025   | 0.25                              |
| SLOS- <i>DHCR7</i>      | p.V326L            | MUT: AAGAGTTTTGGGACCACTGTCTCTCT       | MTAG-A015   | 0.25                              |
|                         |                    | WT: ACAGCTGCACGGGTGGTACAC             |             |                                   |

# Clinical Genetics

Supplementary Table S5: PCR primer and extension probe information for mutations screened by Agena Bioscience™ assay

| Disease-gene | Mutation           | PCR primer (5' to 3')           |                                  | Primer working concentration (µM) | Amplicon size (bp) | Universal extension probe (5' to 3') | Probe working concentration (µM) |
|--------------|--------------------|---------------------------------|----------------------------------|-----------------------------------|--------------------|--------------------------------------|----------------------------------|
|              |                    | Forward                         | Reverse                          |                                   |                    |                                      |                                  |
| ATS-COL4A3   | p.L14_L21del       | ACGTTGGATGGACCGAGCCCTACAAAACC   | ACGTTGGATGGTGGAGGAGGGATGGAAGTG   | 1.0                               | 302                | CCCAGGCCCGAGGTGCTCTGG                | 15.0                             |
|              | p.S296G            | ACGTTGGATGCTCCTATTTTGGCTTCAAG   | ACGTTGGATGATCAGATCACCTTACAAAG    | 0.5                               | 133                | GGCTTCAAGATTTTGTGCCAAC               | 15.0                             |
| AMRS-SLC35A3 | p.Q172*            | ACGTTGGATGCTCAGATTCTCAGCTTGAT   | ACGTTGGATGAAAACATGCTGTGAGAACTG   | 0.5                               | 103                | ACTTTTCAGCTGGTCT                     | 7.0                              |
|              | p.D104A            | ACGTTGGATGCTATGATGCCCTTTTAGTGG  | ACGTTGGATGCTCTCTGTAGAACAATCTGG   | 0.5                               | 102                | GGGACACAGACTAATCTTTTGGCTTATG         | 15.0                             |
| BBS2-BBS2    | p.R632P            | ACGTTGGATGGCACTGTACTAACCATGAC   | ACGTTGGATGTGCTCCGAAGTTTCTGCTGCT  | 0.5                               | 106                | TCACATGTCCCTCATCAGA                  | 5.0                              |
|              | p.S113L            | ACGTTGGATGGGAGAAATACATCCACAGC   | ACGTTGGATGGCTGGTGTGCTTGGACAAAC   | 0.5                               | 100                | AGCCAGCCCTACCTACCC                   | 5.0                              |
| CPT2-CPT2    | p.Q413fs           | ACGTTGGATGTAGCAGCTGTGATGCCAGTC  | ACGTTGGATGACCACTGACTCTACTGTCCAT  | 0.5                               | 99                 | CAGTCAGCTCGAAGTTGAGTTT               | 10.0                             |
|              | p.R124*            | ACGTTGGATGGGGTCAAGATTGAAAGCCAT  | ACGTTGGATGATGAGACCTGGTTTGATATG   | 0.5                               | 105                | AAAGTTCAGAAACAACGGAGTCTC             | 10.0                             |
| CAMT-MPL     | p.S38fs            | ACGTTGGATGTGCTCGGTAGTGCAATGGTG  | ACGTTGGATGTTGGTCCGGGAGCCCCAGT    | 0.5                               | 116                | GTGGCCCGATGCTGCGC                    | 7.0                              |
|              | c.79+2T>A          | ACGTTGGATGCTCAAAACCCTGGCCCAAGTC | ACGTTGGATGcTCCTCTCTCCGGCCATAG    | 0.5                               | 97                 | ACCTGGCCCAAGTCAGCAGCCAAGG            | 15.0                             |
| CDG1A-PM2    | p.P113L            | ACGTTGGATGAGCCCAACATGTGACACTAC  | ACGTTGGATGGTGAGGCCCTAATCCAAGAT   | 0.5                               | 154                | AAACCCACCTCTTCTTC                    | 5.0                              |
|              | p.F119L            | ACGTTGGATGCTACTTTATCGAGTTCGTAG  | ACGTTGGATGTGTCACCCCTTCTATCCAG    | 1.0                               | 145                | CATCCCATTTGGAAITCAAT                 | 10.0                             |
| HYC1-CCDC88C | p.R141H            | ACGTTGGATGCTACTTTATCGAGTTCGTAG  | ACGTTGGATGTGTCAACCTTCTTATTCCCAAG | 1.0                               | 145                | TTTATCGAGTTCGTAGAAGTCAATG            | 15.0                             |
|              | p.V231M            | ACGTTGGATGATCTTACAGACCCCAAGAAC  | ACGTTGGATGAAACAGCAGTTTCAAGATCC   | 0.5                               | 98                 | ACCCAGAAACATGGGCTACTCC               | 15.0                             |
| DC-RTKL1     | p.R312*            | ACGTTGGATGTTTCCCGCAGGAAATCCAG   | ACGTTGGATGTGTCAACCTTCTTATTCCCAAG | 0.5                               | 105                | CCCGCAGGGAATCAGCTCGTCTC              | 15.0                             |
|              | p.R1264H           | ACGTTGGATGTTCCAGTGCCTGCTGTGA    | ACGTTGGATGACCCAGCAAGAACTGTAGTG   | 0.5                               | 113                | GCCTGTGACTCCAGC                      | 5.0                              |
| GALT-GALT    | p.M516I            | ACGTTGGATGTGATGTGACAGGTGTCACCG  | ACGTTGGATCCGGTGTCTCTTTGCTCT      | 0.5                               | 102                | AGGGTGGCCCGTACATCTG                  | 10.0                             |
|              | p.R981W            | ACGTTGGATGTTCTCTACAGGCTTCTACC   | ACGTTGGATGCGGCTGTGCCCGTGCCTT     | 1.0                               | 156                | AGGCTTCTACAGTTTGTG                   | 10.0                             |
| MSD-SUMF1    | p.R998*            | ACGTTGGATGTTCTCTACAGGCTTCTACC   | ACGTTGGATGCGGCTGTGCCCGTGCCTT     | 1.0                               | 156                | TGATCCAGCTGACAGGA                    | 5.0                              |
|              | p.G763V            | ACGTTGGATGCAAGCAGATGAGGCTTCAACT | ACGTTGGATGCGCCCAACAGCGGAAGAACTG  | 0.5                               | 220                | ACTGGCCAGCTCGGATGACATGG              | 10.0                             |
| PHGDH-PHGDH  | 5kb del            | ACGTTGGATGTTGAGCTTCTGATAGTCCCTG | ACGTTGGATGACAGAGCAGACTCCCTGACAA  | 0.5                               | 105                | CTGATAGTCTGACTCTCCAC                 | 10.0                             |
|              | c.253-2A>G         | ACGTTGGATGGTGTGATGCTCTAGCCCTATC | ACGTTGGATGCTGGGAAAGTCGTTGTCAAAC  | 0.5                               | 100                | AGCCTTCTTGTGGT                       | 5.0                              |
| ARPKD-PKHD1  | p.S135L            | ACGTTGGATGCCAGTAAGGTCATGTGCTTC  | ACGTTGGATGAACAACAGCCCGGATCTCAG   | 0.5                               | 100                | AGTAAGGTCATGTCTCCACCCCTGGT           | 15.0                             |
|              | p.Q188R            | ACGTTGGATGcCACTGGAGCCCTTGACACC  | ACGTTGGATGCTTGGTGTCTTTTGGCTAAC   | 0.5                               | 147                | CCCTTGACACCCCTTACC                   | 3.5                              |
| RP59-DHDDS   | p.T138M            | ACGTTGGATGCCAGTAAGGTCATGTGCTTC  | ACGTTGGATGAACAACAGCCCGGATCTCAG   | 0.5                               | 100                | GACATGAGTGGCAGC                      | 5.0                              |
|              | p.F171S            | ACGTTGGATGcCACTGGAGCCCTTGACACC  | ACGTTGGATGCTTGGTGTCTTTTGGCTAAC   | 0.5                               | 147                | TCATGGCCACTTTGTTTTCA                 | 5.0                              |
| SLOS-DHCR7   | p.L195P            | ACGTTGGATGcTTGACAGGATGGGCCAGC   | ACGTTGGATGCTGGGGGCTGTACTCCATTA   | 0.5                               | 136                | ATGGCCAGCAGTTTCC                     | 5.0                              |
|              | p.Y209C            | ACGTTGGATGcTTGACAGGATGGGCCAGC   | ACGTTGGATGCTGGGGGCTGTACTCCATTA   | 0.5                               | 136                | ctcTGATCTCAGCAGGCCT                  | 10.0                             |
| SLOS-DHCR7   | p.K285N            | ACGTTGGATGCCCTCATCATGAAGAAGCTC  | ACGTTGGATGTTGAAAAGCCTACCATGCCC   | 0.5                               | 112                | GAAAGAGCTCTGACCAA                    | 5.0                              |
|              | p.F188del          | ACGTTGGATGTTACAGGATGGGCCAGC     | ACGTTGGATGAAAAGAGCCCGGCTCAGTCT   | 0.5                               | 106                | AGTACCAGGCTATTTCTTCTC                | 15.0                             |
| SLOS-DHCR7   | p.S155P            | ACGTTGGATGCCCTCATCATGAAGAAGCTC  | ACGTTGGATGTTGAAAAGCCTACCATGCCC   | 0.5                               | 97                 | TAGGCTGAGAAGTTTGGCGAC                | 10.0                             |
|              | p.V490M            | ACGTTGGATGACACCCAGTGGAGTCTGGTAG | ACGTTGGATGTGCCAACCAGGAGTTCTTCT   | 0.5                               | 103                | GTAGGACAGCAGCCGCA                    | 5.0                              |
| SLOS-DHCR7   | p.A1254fs          | ACGTTGGATGAAGAACCCTGTTGCCAGCCCA | ACGTTGGATGGAGCATGTGTTGAAACCTG    | 0.5                               | 119                | GCATCGGATCTGCGGG                     | 5.0                              |
|              | p.T36M             | ACGTTGGATGTGTCACCTTGGTAAACCCCTG | ACGTTGGATGACCTGAAGAAGTGTGACCTG   | 2.0                               | 100                | ACCATCAAAAATGACTGTATCCAC             | 15.0                             |
| SLOS-DHCR7   | p.R496*            | ACGTTGGATGTGGTCAACCTTACCTAC     | ACGTTGGATGACACAGACCTGTACTTCTGG   | 0.5                               | 98                 | CGGGAGAAGCACCAGATCCGAGTC             | 10.0                             |
|              | p.L1966fs          | ACGTTGGATGTGCCAATGCTTCTGCTG     | ACGTTGGATGACCTCAAACTTCAACACAC    | 0.5                               | 99                 | GACACTAACACAAGCATCTCAACTTA           | 10.0                             |
| SLOS-DHCR7   | p.V3471G           | ACGTTGGATGCCCAATGAAGAAAGCCCA    | ACGTTGGATGTTATCTTACCATCAGCC      | 0.5                               | 102                | TGAGAGTGTGATCCATGAAGCAG              | 10.0                             |
|              | p.D3230fs          | ACGTTGGATGTTCAAGCAAAAGTGAAGCCG  | ACGTTGGATGTTCAACCTCTCTTGGATTG    | 0.5                               | 98                 | CAGCCAACTTGACATCAACAG                | 7.0                              |
| SLOS-DHCR7   | p.R368H            | ACGTTGGATGAGAAATGGATCAGTGTGCTG  | ACGTTGGATGAAAAGGAGCCAGGCATAG     | 0.5                               | 103                | GGATCAGTGTGGGGAGGGACC                | 10.0                             |
|              | p.K42E             | ACGTTGGATGCATTCATAATGGACCGGAAAC | ACGTTGGATGTTTGAAGCCCTGTGAGTG     | 0.5                               | 102                | TGGACGGGAACCTGCTGATGCCAAG            | 15.0                             |
| SLOS-DHCR7   | c.964-1G>C         | ACGTTGGATGTGCCATGTAGATGATGTAGAA | ACGTTGGATGGGTGCTTTATTACAGAAGAGA  | 0.5                               | 520                | TTCCCTCGCCCCCA                       | 5.0                              |
|              | p.W151* (c.452G>A) | ACGTTGGATGTCCAGTTGTGCAAGATGATG  | ACGTTGGATGIGTGAACAAGTATCAGATCA   | 0.5                               | 136                | AGAGCAGGTGCGTGAGGAGC                 | 7.5                              |
| SLOS-DHCR7   | p.W151* (c.453G>A) | ACGTTGGATGTCCAGTTGTGCAAGATGATG  | ACGTTGGATGIGTGAACAAGTATCAGATCA   | 0.5                               | 136                | tgcacACCAGAGCAGGTGCGTGAGGAG          | 15.0                             |
|              | p.M1V              | ACGTTGGATGTGACGCCATCTAGACTCTTG  | ACGTTGGATGCAAGGTTCTCTTTCTGCAAG   | 0.5                               | 101                | GGTGTGCCATTTTGCAGCCA                 | 5.0                              |
| SLOS-DHCR7   | p.V326L            | ACGTTGGATGTGCCATGTAGATGATGTAGAA | ACGTTGGATGGGTGCTTTATTACAGAAGAGA  | 2.0                               | 520                | ggcatCTGCACGGGTGGTACA                | 10.0                             |
|              | p.T93M             | ACGTTGGATGgGACATGCTCGGCTCTCGGA  | ACGTTGGATGACCCACAAGGTATAGAGCTG   | 0.5                               | 100                | CCAAGACTCCACCTATAA                   | 3.5                              |
| SLOS-DHCR7   | p.R352Q            | ACGTTGGATGTGCCATGTAGATGATGTAGAA | ACGTTGGATGGGTGCTTTATTACAGAAGAGA  | 0.5                               | 520                | TGGGCTACTACATCTTCC                   | 5.0                              |
|              | p.R352W            | ACGTTGGATGTGCCATGTAGATGATGTAGAA | ACGTTGGATGGGTGCTTTATTACAGAAGAGA  | 0.5                               | 520                | GGTGGGCTACTACATCTTC                  | 5.0                              |
| SLOS-DHCR7   | p.R404C            | ACGTTGGATGTGCCATGTAGATGATGTAGAA | ACGTTGGATGGGTGCTTTATTACAGAAGAGA  | 2.0                               | 520                | GGGCTTCTGGGGCGTGGCC                  | 7.5                              |
|              | p.S169L            | ACGTTGGATGIGTGAACAAGTATCAGATCA  | ACGTTGGATGCCAGTGTGCAAGATGATG     | 0.5                               | 136                | TCATCTCTGCTGCTGGTCTC                 | 5.0                              |
| SLOS-DHCR7   | p.R242C            | ACGTTGGATGGAAGTGGTTTGACTTCAAGC  | ACGTTGGATGCTGCGAAGGACAGGTTGATG   | 0.5                               | 100                | GACTTCAAGCTGTTCTTCAATGGG             | 10.0                             |
|              | p.R242H            | ACGTTGGATGGAAGTGGTTTGACTTCAAGC  | ACGTTGGATGCTGCGAAGGACAGGTTGATG   | 0.5                               | 100                | ggccGGCAGCATCCCGGGG                  | 10.0                             |
| SLOS-DHCR7   | p.F302L            | ACGTTGGATGGGACTTGAAGACCAATTGAC  | ACGTTGGATGAAGATAAGGCAGCCAGACAC   | 2.0                               | 103                | CCATTGACATCTGCCATGCCACTT             | 15.0                             |
|              | p.G410S            | ACGTTGGATGTGCCATGTAGATGATGTAGAA | ACGTTGGATGGGTGCTTTATTACAGAAGAGA  | 2.0                               | 520                | GGCCAGGCTGCCATCAGGTGCGC              | 10.0                             |
| SLOS-DHCR7   | p.E448K            | ACGTTGGATGTGAAGATTCCAGCAGCAG    | ACGTTGGATGTACATGGCCATCTGCTGAC    | 0.5                               | 145                | GGCCCTACTGCTGGCCAGCGTGGCT            | 20.0                             |
|              | p.P261L            | ACGTTGGATGTCCCTGGGAAGAGTTTGGG   | ACGTTGGATGCACAAAGGGCATGAGAG      | 0.5                               | 94                 | TGGACCCTGTCTCTC                      | 5.0                              |
| SLOS-DHCR7   | c.554-1G>T         | ACGTTGGATGAGCTTGGCAGCCACATATAC  | ACGTTGGATGTGTTCCACACAGAGAGTTC    | 0.5                               | 122                | CACCATATCGGGAGGCTTAG                 | 10.0                             |
|              | c.1062+5G>A        | ACGTTGGATGGAATCTCTTCTCGAGGCTG   | ACGTTGGATGCTGGCTTCTGGACCATC      | 0.5                               | 145                | GCCTCAGTCGACCCAGATA                  | 5.0                              |
| SLOS-DHCR7   | p.Q64H             | ACGTTGGATGCAGGGACAAGTCGTTTAC    | ACGTTGGATGACCTCTTACTGGTCTGTG     | 0.5                               | 100                | CAAGTCGTTTCAATGTCTTAC                | 10.0                             |
|              | p.W262*            | ACGTTGGATGCTCTTGGGAAGAGTTTGGG   | ACGTTGGATGCACAGCAAAGGGCATGAGAG   | 0.5                               | 94                 | GGCATGAGAGCATCCATGGGCCACC            | 15.0                             |
| SLOS-DHCR7   | p.E357*            | ACGTTGGATGTATGGGCTTCGTTCCCTTCC  | ACGTTGGATGTTCTTCCCTTCTCTGTGATG   | 0.5                               | 100                | GACAGTCCAACTGGAGCCGAAGTTT            | 15.0                             |
|              | p.E1064A           | ACGTTGGATGAGTATTTGGTGACTGCCACG  | ACGTTGGATGTGAGGAGGTTCTGGGCTGTG   | 2.0                               | 98                 | GTTCTGGCTGTGGTGGGGACTGCGG            | 25.0                             |
| SLOS-DHCR7   | p.H1069Q           | ACGTTGGATGAGTATTTGGTGACTGCCACG  | ACGTTGGATGTGAGGAGGTTCTGGGCTGTG   | 0.5                               | 98                 | GACTGCCACGCCCAAGGG                   | 5.0                              |
|              | p.R778L            | ACGTTGGATGGCAGCTCTTTTCTGAACCTG  | ACGTTGGATGGCTCTTTGTGTTTCTGCCC    | 0.5                               | 102                | TTACTTTGCCAAGTGTCCAGCCAC             | 15.0                             |
| SLOS-DHCR7   | p.M645R            | ACGTTGGATGAGAGTGGGCCCAAGTAGAG   | ACGTTGGATGCCCAACAAGTCTACTGAGCCA  | 0.5                               | 296                | gTTTCTACCTACTGCTTTATTTCC             | 10.0                             |
|              | p.G843D            | ACGTTGGATGCCTGCATAAACCTAGAGACC  | ACGTTGGATGATATCCATGAGTATGCCC     | 0.5                               | 96                 | AGACCTGGGTTGGACAAGATTG               | 10.0                             |
| SLOS-DHCR7   | p.I700fs           | ACGTTGGATGTTGTGGCAATCAGTGCAACC  | ACGTTGGATGGCTTAATCCAGCTTGAATG    | 0.5                               | 95                 | CAAACTTCCCATGGAGATAA                 | 10.0                             |
|              | p.G983fs           | ACGTTGGATGGATGACATGTGACATTTTG   | ACGTTGGATGCCGAGTAGTTAACCACTTGC   | 0.5                               | 128                | ATAATTTACCCTGTAAGCCT                 | 10.0                             |
| SLOS-DHCR7   | p.R119*            | ACGTTGGATGGTACAATGGTGGCAGGTGG   | ACGTTGGATGACACACTGCTTACTTCCC     | 0.5                               | 111                | GCAGGTGGTTAGAAGAA                    | 5.0                              |

# Clinical Genetics

Supplementary Table S6: Agena Bioscience™ PCR primer and extension probe information for the clinical panel of 18 new AJ diseases

| Disease-gene    | Mutation           | PCR primer (5' to 3')            |                                  | Primer working concentration (µM) | Amplicon size (bp) | Universal extension probe (5' to 3') | Probe working concentration (µM) |
|-----------------|--------------------|----------------------------------|----------------------------------|-----------------------------------|--------------------|--------------------------------------|----------------------------------|
|                 |                    | Forward                          | Reverse                          |                                   |                    |                                      |                                  |
| ABL-MTTP        | p.G865*            | ACGTTGGATGTGCCACAGGAGAGTTATG     | ACGTTGGATGCCTTCGGGGAGACAATTCAA   | 0.5                               | 209                | TGAGGGAGCGGGAATTCATC                 | 10.0                             |
|                 | p.S738fs           | ACGTTGGATGCAGTGTGGTGAAGGACTT     | ACGTTGGATGCCAAGATGGGCCAAATTTTG   | 0.5                               | 172                | AGGACTTATTCTGCTAATAGATCAT            | 15.0                             |
| ATS-COL4A3      | p.L14_L21del       | ACGTTGGATGGACCGAGCCCTACAAAACC    | ACGTTGGATGGTGGAGGAGGGATGGAAGTG   | 1.0                               | 302                | CCGAGCCCGAGGCTCCTGG                  | 15.0                             |
| AMRS-SLC35A3    | p.S296G            | ACGTTGGATGCTCTTATGGCTTCAAG       | ACGTTGGATGATCAGATCACTTACAAG      | 0.5                               | 133                | GGCTTCAAGATTTTGGCCAAACC              | 15.0                             |
|                 | p.Q172*            | ACGTTGGATGCCTCAGATTCTCAGCTTGAT   | ACGTTGGATGAAAACATGCTGTGAGAAGCTG  | 0.5                               | 103                | ACCTTTCAGCTGGTCT                     | 7.0                              |
| BBS2-BBS2       | p.D104A            | ACGTTGGATGCTATGATGCCCTTATAGTGG   | ACGTTGGATGCTCTCTGTGAGAACAATCCG   | 0.5                               | 102                | GGACACAGACTAATTTGGCTTATG             | 15.0                             |
|                 | p.R632P            | ACGTTGGATGCCACCTGTACTAACCATGAC   | ACGTTGGATGTGATCCGAAGTTTGTCTGGTCT | 0.5                               | 106                | TCACATGTCCCTCATAGA                   | 5.0                              |
| CPT2-CPT2       | p.S113L            | ACGTTGGATGGGAAATCATACCCACAGC     | ACGTTGGATGGCTGGTGTCTGTGACAACAAC  | 0.5                               | 100                | AGCCGACCTACCTACCC                    | 5.0                              |
|                 | p.Q413fs           | ACGTTGGATGACAGCTGTGATGCCAGCT     | ACGTTGGATGACCACTGACTCTACTGTCTAC  | 0.5                               | 99                 | CAGTCACTCGAAGTTGAGTTT                | 10.0                             |
|                 | p.R124*            | ACGTTGGATGGGTCAGGATGAAAGCCAT     | ACGTTGGATGTAGGACCCCTGGTTTGSATG   | 0.5                               | 105                | AAAGTTCAGAACACCGGAGTCTC              | 10.0                             |
|                 | p.S38fs            | ACGTTGGATGTCTCGGTAGTGCATGGTG     | ACGTTGGATGTTGGTCCGGGAGCCCCAGT    | 0.5                               | 116                | GTGGGCACGATGCTGCCG                   | 7.0                              |
| CAMT-MPL        | c.79+2T>A          | ACGTTGGATGCTCAAACCTGGCCCAAGTC    | ACGTTGGATGCTCCCTCTTCTCGGGCATTG   | 0.5                               | 97                 | ACCTGGCCCAAGTCAGCAGCCAAAGG           | 15.0                             |
|                 | p.P113L            | ACGTTGGATGAGCCACCATTGTGACACTAC   | ACGTTGGATGGTGGAGCCCTTAATCCAAGAT  | 0.5                               | 154                | AAACCCACCTCTTCTTC                    | 5.0                              |
|                 | p.F119L            | ACGTTGGATGCGTACTTATCGAGTTCTGTAG  | ACGTTGGATGTGCACCCCTTCAATCCCAAG   | 1.0                               | 145                | CATCCATTTCCGGAATTCAT                 | 10.0                             |
|                 | p.R141H            | ACGTTGGATGCGTACTTATCGAGTTCTGTAG  | ACGTTGGATGTGCACCCCTTCAATCCCAAG   | 1.0                               | 145                | TTTATCGAGTTCTGCTAGAACCTAATG          | 15.0                             |
|                 | p.V231M            | ACGTTGGATGCTTACACAGCCCGAGAAC     | ACGTTGGATGGAAACAGCAGCTACACAGATCC | 0.5                               | 98                 | ACCCGAGAACCATGGCTACTCC               | 15.0                             |
|                 | p.R1264H           | ACGTTGGATGTTCCAGTGCCTGCTGTGA     | ACGTTGGATGACCCAGCAGGAACGTGATGTG  | 0.5                               | 113                | CGTGTGACTTCCAGC                      | 5.0                              |
|                 | p.M516I            | ACGTTGGATGTGATGTCAAGAGTGTCAACC   | ACGTTGGATGCCGGTGTCTCTTGTCTCT     | 0.5                               | 102                | AGGGGTGGCCCGTACATCTG                 | 10.0                             |
|                 | p.R981W            | ACGTTGGATGTTCTCTACAGGCTTCTACC    | ACGTTGGATGCCGGCTGTGCCCGCTGCTT    | 1.0                               | 156                | AGGCTTCTACCAAGTTGTG                  | 10.0                             |
|                 | p.R998*            | ACGTTGGATGTTCTCTACAGGCTTCTACC    | ACGTTGGATGCCGGCTGTGCCCGCTGCTT    | 1.0                               | 156                | TGATCCAGCTGACAGGA                    | 5.0                              |
|                 | p.G763V            | ACGTTGGATGCCAGAGATGAGGGTCTTCACTT | ACGTTGGATGTCGGCAACACGGGAAGAACCTG | 0.5                               | 220                | ACTGGGCCAGCTCTCGGATGACATGG           | 10.0                             |
| EDSVIIC-ADAMTS2 | p.Q225*            | ACGTTGGATGCCAAGCTGGTCTGTGGAGAG   | ACGTTGGATGCCGCTGTGCATGTGTGTATC   | 0.5                               | 195                | GGAAATCACTGTGTCCAGGGGCT              | 15.0                             |
|                 | p.W795*            | ACGTTGGATGTGAAGGCTCAGGAGGCTCA    | ACGTTGGATGTCCAAACCTTCACTGGATGG   | 0.5                               | 219                | CTCTCGTCTGTACTCC                     | 5.0                              |
| GALT-GALT       | 5kb del            | ACGTTGGATGTGGAGCTTCTGATAGTCTCTG  | ACGTTGGATGACAGAGCAAGCTCCGTCACA   | 0.5                               | 105                | CTGATAGTCTGTACTTCCAC                 | 10.0                             |
|                 | c.253-2A>G         | ACGTTGGATGGTGAAGTCTTCAAGCTATC    | ACGTTGGATGCTGGGAAGCTGTTGTCAACA   | 0.5                               | 100                | AGCCTATCCTTGTCCGT                    | 5.0                              |
|                 | p.S135L            | ACGTTGGATGCCAGTAAGGTCATGTGCTTC   | ACGTTGGATGAACAACAGCCCGGATCTCAG   | 0.5                               | 100                | AGTAAGGTGATGTGCTTCCACCCCTGGT         | 15.0                             |
|                 | p.Q188R            | ACGTTGGATGcCACTGGAGCCCTGACACC    | ACGTTGGATGCTTGGTGTCTTTGGTACTAC   | 0.5                               | 147                | CCCTGACACCCCTTACC                    | 3.5                              |
|                 | p.T138M            | ACGTTGGATGCCAGTAAGGTCATGTGCTTC   | ACGTTGGATGAACAACAGCCCGGATCTCAG   | 0.5                               | 100                | GACATGATGGGCAGC                      | 5.0                              |
|                 | p.F171S            | ACGTTGGATGcCACTGGAGCCCTGACACC    | ACGTTGGATGCTTGGTGTCTTTGGTAAAC    | 0.5                               | 147                | TCATGGCACCTTTGTTTTCA                 | 5.0                              |
|                 | p.L195P            | ACGTTGGATGcTTGACAGGTATGGGCCAGC   | ACGTTGGATGCTGGCCGCTGTACTCCATTA   | 0.5                               | 136                | ATGGCCAGCAGTTTTCC                    | 5.0                              |
|                 | p.Y209C            | ACGTTGGATGcTTGACAGGTATGGGCCAGC   | ACGTTGGATGCTGGCCGCTGTACTCCATTA   | 0.5                               | 136                | ctcTCGATCTCAGCAGCCCT                 | 10.0                             |
| MSD-SUMF1       | p.K285N            | ACGTTGGATGCCTCCATCAAGAAGGCTC     | ACGTTGGATGTTGAAAGGCTCACCATGCC    | 0.5                               | 112                | GAAAGAAGCTCTTGACCAA                  | 5.0                              |
|                 | p.S155P            | ACGTTGGATGCCTACCTTCTTATAGGCTG    | ACGTTGGATGTGGTCTTCACTTGTCTCACT   | 0.5                               | 97                 | TAGGTGAGAAGTTTGGGCAC                 | 10.0                             |
| PHGDHD-PHGDH    | p.V490M            | ACGTTGGATGACACCAAGTGAAGTCTGGTAG  | ACGTTGGATGTGCCAACCAGGAGTTTCTTC   | 0.5                               | 103                | GTAGGACAGCAGCCGCA                    | 5.0                              |
|                 | p.A1254fs          | ACGTTGGATGAAGAAGCTTGTGCCAGCCCA   | ACGTTGGATGGAGCATCTGGTGTGAACACC   | 0.5                               | 119                | GCATCGGGTATCTGGGG                    | 5.0                              |
|                 | p.T36M             | ACGTTGGATGTGCACTTGGTAAAAACCC     | ACGTTGGATGACCTGAAGAAGTGTAGCCTTG  | 2.0                               | 100                | ACCATAAAAAATGACTGTGATCCAC            | 15.0                             |
|                 | p.R496*            | ACGTTGGATGTGGTCCACCACTTACCTAC    | ACGTTGGATGACACAGACTGTACTTCTGG    | 0.5                               | 98                 | CGGGAGAAGCACCAAGCATCCGAGTCC          | 10.0                             |
|                 | p.L1966fs          | ACGTTGGATGTGGCCAAATGGTCTGTGCTG   | ACGTTGGATGACCTACAACCTTACACACACC  | 0.5                               | 99                 | GACACTAACACAAGCATCTCAACTTA           | 10.0                             |
|                 | p.V3471G           | ACGTTGGATGCCCCAATGAAGAAAGCGCA    | ACGTTGGATGTTTCTTACTTACCCATCAGGC  | 0.5                               | 102                | TGAGGAGTTTGTCCATGAAGCAG              | 10.0                             |
| RP59-DHDDS      | p.D3230fs          | ACGTTGGATGTTCAAGCAAAAGTGAAGCCG   | ACGTTGGATGTTGACCTCCTCTTGGATTG    | 0.5                               | 98                 | CAGCCAACCTTGACATCAACAG               | 7.0                              |
|                 | p.K42E             | ACGTTGGATGCATTATAATGGACGGGAAC    | ACGTTGGATGTTGTTGAAGCCCTGTGAGTG   | 0.5                               | 102                | TGGACGGGAACCGTCGCTATGCCAAG           | 15.0                             |
| SLOS-DHCR7      | c.964-1G>C         | ACGTTGGATGTGGCCATGTAGATGATGTAGAA | ACGTTGGATGGTGCTTTTATTACAGAAGAGA  | 0.5                               | 520                | TTCCCCCTCGCCCCCA                     | 5.0                              |
|                 | p.W151* (c.452G>A) | ACGTTGGATGTCCAGTTGTCCGAAGATGATG  | ACGTTGGATGIGTGAACAAGTATCAGATCA   | 0.5                               | 136                | AGAGCAGGTGCGTGAGGAGC                 | 7.5                              |
|                 | p.W151* (c.453G>A) | ACGTTGGATGTCCAGTTGTCCGAAGATGATG  | ACGTTGGATGIGTGAACAAGTATCAGATCA   | 0.5                               | 136                | tgcaACCAGAGCAGGTGCGTGAGGAG           | 15.0                             |
|                 | p.M1V              | ACGTTGGATGCTGACGCCATCTAGACTCTTG  | ACGTTGGATGCAAGTGTCTTCTTCTGGAG    | 0.5                               | 101                | GGTGTGGATTTTGCAGCA                   | 5.0                              |
|                 | p.V326L            | ACGTTGGATGTGGCCATGTAGATGATGTAGAA | ACGTTGGATGGTGCTTTTATTACAGAAGAGA  | 2.0                               | 520                | ggcatCTGCACGGGTGGTACA                | 10.0                             |
|                 | p.T93M             | ACGTTGGATGgGACATGCTCGGCTCTCGGA   | ACGTTGGATGACCCACAAGTATAGAGCTG    | 0.5                               | 100                | CCAAGACTCCACTATAA                    | 3.5                              |
|                 | p.R352Q            | ACGTTGGATGTGGCCATGTAGATGATGTAGAA | ACGTTGGATGGTGCTTTTATTACAGAAGAGA  | 0.5                               | 520                | TGGGCTACTACATCTCC                    | 5.0                              |
|                 | p.R352W            | ACGTTGGATGTGGCCATGTAGATGATGTAGAA | ACGTTGGATGGTGCTTTTATTACAGAAGAGA  | 0.5                               | 520                | GGTGGCTACTACATCTTC                   | 5.0                              |
|                 | p.R404C            | ACGTTGGATGTGGCCATGTAGATGATGTAGAA | ACGTTGGATGGTGCTTTTATTACAGAAGAGA  | 2.0                               | 520                | GGGCTTCTGGGGCGTGGCC                  | 7.5                              |
|                 | p.S169L            | ACGTTGGATGIGTGAACAAGTATCAGATCA   | ACGTTGGATGTCACAGTTCGAAGATGATG    | 0.5                               | 136                | TCATCTCCTCTCTGGTCT                   | 5.0                              |
|                 | p.R242C            | ACGTTGGATGGAAGTGGTTTGTACTTCAAGC  | ACGTTGGATGCTGCGAAGGACAGGTTGATG   | 0.5                               | 100                | GACTTCAAGCTGTTTCAATGGG               | 10.0                             |
|                 | p.R242H            | ACGTTGGATGGAAGTGGTTTGTACTTCAAGC  | ACGTTGGATGCTGCGAAGGACAGGTTGATG   | 0.5                               | 100                | ggccGGCAGCATCCCGGG                   | 10.0                             |
|                 | p.F302L            | ACGTTGGATGGGTACCTGAAGACCATTGAC   | ACGTTGGATGAAGATAAGCCAGCCAGACAC   | 2.0                               | 103                | CCATTGACATCTGCCATGACCCTT             | 15.0                             |
|                 | p.G410S            | ACGTTGGATGTGGCCATGTAGATGATGTAGAA | ACGTTGGATGGTGCTTTTATTACAGAAGAGA  | 2.0                               | 520                | GGCCAGCTGCCCATCAGCTGCG               | 10.0                             |
| TYRSN1-FAH      | p.E448K            | ACGTTGGATGAGAAGTCCAAGCAGCAG      | ACGTTGGATGTACATGGCCATCTGTCTGAC   | 0.5                               | 145                | GGCCGACTTGTGGCGAGCGGTGCT             | 20.0                             |
|                 | p.P261L            | ACGTTGGATGCTTGGGAAGATTTTGGG      | ACGTTGGATGCACAGCAAGGCAATGAGAG    | 0.5                               | 94                 | TGGAACCACTGTCTCTC                    | 5.0                              |
|                 | c.554-1G>T         | ACGTTGGATGAGCTTCCAGGCACATATAC    | ACGTTGGATGTGTTCCACACAGAGGACTTC   | 0.5                               | 122                | CACCATATACGGGAGCGTTAG                | 10.0                             |
|                 | c.1062+5G>A        | ACGTTGGATGGAATGCTTCTCAGGCTG      | ACGTTGGATGCTCTGGCTTCTGSGAGCTTC   | 0.5                               | 145                | CCCTCAGTCCAGCCAGATA                  | 5.0                              |
|                 | p.Q64H             | ACGTTGGATGTCAAGGCAAGTCTGTTTAC    | ACGTTGGATGACCTCTTACTGGTCTGCTG    | 0.5                               | 100                | CAAGTCTTTCACATGCTCAT                 | 10.0                             |
|                 | p.W262*            | ACGTTGGATGCTTGGGAAGATTTTGGG      | ACGTTGGATGCACAGCAAGGCAATGAGAG    | 0.5                               | 94                 | GGCATGAGACATCCATGGGCACCAC            | 15.0                             |
| WD-ATP7B        | p.E357*            | ACGTTGGATGTATGGGCTTCTGTTCCCTTCC  | ACGTTGGATGTTCTTCCCTTCTGTGTGATG   | 0.5                               | 100                | GACAGTTTCCACATGGAGCCGAAGTTT          | 15.0                             |
|                 | p.E1064A           | ACGTTGGATGAGTATTTGGTGACTGCCACG   | ACGTTGGATGTCAGGAAGTCTGGCTGTG     | 2.0                               | 98                 | GTCTTGCTGTGGTGGGACTCGGG              | 25.0                             |
|                 | p.H1069Q           | ACGTTGGATGAGTATTTGGTGACTGCCACG   | ACGTTGGATGTCAGGAAGTCTGGCTGTG     | 2.0                               | 98                 | GACTGCCAGCCCAAGG                     | 5.0                              |
|                 | p.R778L            | ACGTTGGATGGCAGCTCTTCTGAACCTG     | ACGTTGGATGGCTCTTGTGTTCAITGGCC    | 0.5                               | 102                | TTACTCTTGGCAAGTGTCCAGCCAC            | 15.0                             |
|                 | p.M645R            | ACGTTGGATGAGAGTTGGGCCAGGTAGAG    | ACGTTGGATGCCACAAGTCTACTGAGGCA    | 0.5                               | 296                | gTTCTTACTTACTGTTTATTTC               | 10.0                             |
|                 | p.R119*            | ACGTTGGATGGTACAATTTGGTGGCAGTGG   | ACGTTGGATGACACACTGCTTACTTCCC     | 0.5                               | 111                | GCAGGTGGTTAGAAGAA                    | 5.0                              |

## Clinical Genetics

**Supplementary Table S7: Screening results for 85 variants among over 3,000 AJ and over 6,000 non-AJ individuals**

| Disease <sup>a</sup> -gene                                      | Mutation                  | AJ population |     |     |      |        | Non-AJ population |     |     |      |       |
|-----------------------------------------------------------------|---------------------------|---------------|-----|-----|------|--------|-------------------|-----|-----|------|-------|
|                                                                 |                           | Sample size   | HOM | HET | WT   | HWE p  | Sample size       | HOM | HET | WT   | HWE p |
| <i>Diseases that are included in AJ carrier screening panel</i> |                           |               |     |     |      |        |                   |     |     |      |       |
| ABL-MTTP                                                        | p.G865*                   | 3347          | 1   | 15  | 3331 | <0.001 | 7071              | 0   | 5   | 7066 | 0.98  |
|                                                                 | p.S738fs                  | 2954          | 0   | 1   | 2953 | 0.99   | 7071              | 0   | 0   | 7071 | N/A   |
| ATS-COL4A3                                                      | p.L14_L21del              | 3639          | 0   | 19  | 3620 | 0.87   | 7240              | 0   | 2   | 7238 | 0.99  |
| AMRS-SLC35A3                                                    | p.S296G                   | 3622          | 0   | 8   | 3614 | 0.95   | 7239              | 0   | 2   | 7237 | 0.99  |
|                                                                 | p.Q172*                   | 3617          | 0   | 0   | 3617 | N/A    | 7239              | 0   | 0   | 7239 | N/A   |
| BBS2-BBS2                                                       | p.D104A                   | 3627          | 0   | 10  | 3617 | 0.93   | 7232              | 0   | 10  | 7222 | 0.95  |
|                                                                 | p.R632P                   | 3626          | 0   | 16  | 3610 | 0.89   | 7232              | 0   | 0   | 7232 | N/A   |
| CPT2-CPT2                                                       | p.S113L                   | 3587          | 0   | 44  | 3543 | 0.71   | 6815              | 0   | 52  | 6763 | 0.75  |
|                                                                 | p.Q413fs                  | 3586          | 0   | 26  | 3560 | 0.83   | 6815              | 0   | 0   | 6815 | N/A   |
|                                                                 | p.R124*                   | 3590          | 0   | 0   | 3590 | N/A    | 6815              | 0   | 0   | 6815 | N/A   |
|                                                                 | p.S38fs                   | 3573          | 0   | 0   | 3573 | N/A    | 6815              | 0   | 0   | 6815 | N/A   |
| CAMT-MPL                                                        | c.79+2T>A                 | 3617          | 0   | 64  | 3553 | 0.59   | 7069              | 0   | 14  | 7055 | 0.93  |
| CDG1A-PMM2                                                      | p.P113L                   | 3575          | 0   | 0   | 3575 | N/A    | 6813              | 0   | 64  | 6749 | 0.70  |
|                                                                 | p.F119L                   | 3579          | 0   | 0   | 3579 | N/A    | 6813              | 0   | 0   | 6813 | N/A   |
|                                                                 | p.R141H                   | 3578          | 0   | 59  | 3519 | 0.62   | 6813              | 0   | 0   | 6813 | N/A   |
|                                                                 | p.V231M                   | 3575          | 0   | 0   | 3575 | N/A    | 6813              | 0   | 0   | 6813 | N/A   |
| DC-RTEL1                                                        | p.R1264H                  | 3627          | 0   | 19  | 3608 | 0.87   | 7239              | 0   | 14  | 7225 | 0.93  |
|                                                                 | p.M516I                   | 3630          | 0   | 3   | 3627 | 0.98   | 7239              | 0   | 0   | 7239 | N/A   |
|                                                                 | p.R981W                   | 3627          | 0   | 0   | 3627 | N/A    | 7239              | 0   | 0   | 7239 | N/A   |
|                                                                 | p.R998*                   | 3627          | 0   | 0   | 3627 | N/A    | 7239              | 0   | 0   | 7239 | N/A   |
|                                                                 | p.G763V                   | 3619          | 0   | 0   | 3619 | N/A    | 7239              | 0   | 0   | 7239 | N/A   |
| EDSVIIC-ADAMTS2                                                 | p.Q225*                   | 3367          | 0   | 18  | 3349 | 0.88   | 7235              | 0   | 7   | 7228 | 0.97  |
|                                                                 | p.W795*                   | 3367          | 0   | 0   | 3367 | N/A    | 7235              | 0   | 0   | 7235 | N/A   |
| GALT-GALT                                                       | c.-1039_+789del5573ins129 | 3582          | 0   | 18  | 3564 | 0.88   | 6815              | 0   | 42  | 6773 | 0.80  |
|                                                                 | c.253-2A>G                | 3581          | 0   | 0   | 3581 | N/A    | 6815              | 0   | 0   | 6815 | N/A   |
|                                                                 | p.S135L                   | 3576          | 0   | 1   | 3575 | 0.99   | 6815              | 0   | 0   | 6815 | N/A   |
|                                                                 | p.Q188R                   | 3576          | 0   | 2   | 3574 | 0.99   | 6815              | 0   | 0   | 6815 | N/A   |
|                                                                 | p.T138M                   | 3575          | 0   | 0   | 3575 | N/A    | 6815              | 0   | 0   | 6815 | N/A   |
|                                                                 | p.F171S                   | 3582          | 0   | 0   | 3582 | N/A    | 6815              | 0   | 0   | 6815 | N/A   |
|                                                                 | p.L195P                   | 3575          | 0   | 0   | 3575 | N/A    | 6815              | 0   | 0   | 6815 | N/A   |
|                                                                 | p.Y209C                   | 3573          | 0   | 0   | 3573 | N/A    | 6815              | 0   | 0   | 6815 | N/A   |

### Clinical Genetics

|              |                    |      |   |    |      |      |       |   |     |       |      |
|--------------|--------------------|------|---|----|------|------|-------|---|-----|-------|------|
|              | p.K285N            | 3581 | 0 | 2  | 3579 | 0.99 | 6815  | 0 | 0   | 6815  | N/A  |
| MSD-SUMF1    | p.S155P            | 3625 | 0 | 13 | 3612 | 0.91 | 7238  | 0 | 8   | 7230  | 0.96 |
| PHGDHD-PHGDH | p.V490M            | 3625 | 0 | 8  | 3617 | 0.95 | 7242  | 0 | 3   | 7239  | 0.99 |
| ARPKD-PKHD1  | p.A1254fs          | 3578 | 0 | 33 | 3545 | 0.78 | 6815  | 0 | 30  | 6785  | 0.86 |
|              | p.T36M             | 3587 | 0 | 1  | 3586 | 0.99 | 6815  | 0 | 0   | 6815  | N/A  |
|              | p.R496*            | 3581 | 0 | 0  | 3581 | N/A  | 6815  | 0 | 0   | 6815  | N/A  |
|              | p.L1966fs          | 3581 | 0 | 0  | 3581 | N/A  | 6815  | 0 | 0   | 6815  | N/A  |
|              | p.V3471G           | 3583 | 0 | 0  | 3583 | N/A  | 6815  | 0 | 0   | 6815  | N/A  |
|              | p.D3230fs          | 3581 | 0 | 0  | 3581 | N/A  | 6815  | 0 | 0   | 6815  | N/A  |
| RP59-DHDDS   | p.K42E             | 3621 | 0 | 31 | 3590 | 0.8  | 7238  | 0 | 19  | 7219  | 0.91 |
| SLOS-DHCR7   | c.964-1G>C         | 3604 | 0 | 86 | 3518 | 0.47 | 15369 | 0 | 126 | 15243 | 0.61 |
|              | p.W151* (c.452G>A) | 3612 | 0 | 3  | 3609 | 0.98 | 15369 | 0 | 0   | 15369 | N/A  |
|              | p.W151* (c.453G>A) | 3612 | 0 | 0  | 3614 | N/A  | 15369 | 0 | 0   | 15369 | N/A  |
|              | p.M1V              | 3615 | 0 | 0  | 3615 | N/A  | 15369 | 0 | 0   | 15369 | N/A  |
|              | p.V326L            | 3602 | 0 | 0  | 3602 | N/A  | 15369 | 0 | 0   | 15369 | N/A  |
|              | p.T93M             | 3612 | 0 | 0  | 3612 | N/A  | 15369 | 0 | 0   | 15369 | N/A  |
|              | p.R352Q            | 3601 | 0 | 0  | 3601 | N/A  | 15369 | 0 | 0   | 15369 | N/A  |
|              | p.R352W            | 3602 | 0 | 0  | 3602 | N/A  | 15369 | 0 | 0   | 15369 | N/A  |
|              | p.R404C            | 3602 | 0 | 0  | 3602 | N/A  | 15369 | 0 | 0   | 15369 | N/A  |
|              | p.S169L            | 3615 | 0 | 0  | 3615 | N/A  | 15369 | 0 | 0   | 15369 | N/A  |
|              | p.R242C            | 3614 | 0 | 0  | 3614 | N/A  | 15369 | 0 | 0   | 15369 | N/A  |
|              | p.R242H            | 3613 | 0 | 0  | 3613 | N/A  | 15369 | 0 | 0   | 15369 | N/A  |
|              | p.F302L            | 3613 | 0 | 0  | 3613 | N/A  | 15369 | 0 | 0   | 15369 | N/A  |
|              | p.G410S            | 3602 | 0 | 0  | 3602 | N/A  | 15369 | 0 | 0   | 15369 | N/A  |
|              | p.E448K            | 3606 | 0 | 0  | 3606 | N/A  | 15369 | 0 | 0   | 15369 | N/A  |
| TYRSN1-FAH   | p.P261L            | 3581 | 0 | 24 | 3557 | 0.84 | 6813  | 0 | 11  | 6802  | 0.95 |
|              | c.554-1G>T         | 3571 | 0 | 0  | 3571 | N/A  | 6813  | 0 | 0   | 6813  | N/A  |
|              | c.1062+5G>A        | 3578 | 0 | 1  | 3577 | 0.99 | 6813  | 0 | 0   | 6813  | N/A  |
|              | p.Q64H             | 3577 | 0 | 0  | 3577 | N/A  | 6813  | 0 | 0   | 6813  | N/A  |
|              | p.W262*            | 3574 | 0 | 0  | 3574 | N/A  | 6813  | 0 | 0   | 6813  | N/A  |
|              | p.E357*            | 3566 | 0 | 0  | 3566 | N/A  | 6813  | 0 | 0   | 6813  | N/A  |
| WD-ATP7B     | p.E1064A           | 3572 | 0 | 20 | 3552 | 0.87 | 6813  | 0 | 36  | 6777  | 0.83 |
|              | p.H1069Q           | 3565 | 0 | 25 | 3540 | 0.83 | 6813  | 0 | 0   | 6813  | N/A  |
|              | p.R778L            | 3578 | 0 | 0  | 3578 | N/A  | 6813  | 0 | 0   | 6813  | N/A  |
|              | p.M645R            | 3563 | 0 | 8  | 3555 | 0.95 | 6813  | 0 | 0   | 6813  | N/A  |
| PBD5A-PEX2   | p.R119*            | 3626 | 0 | 16 | 3610 | 0.89 | 7232  | 0 | 5   | 7227  | 0.98 |

## Clinical Genetics

### *Diseases that are not appropriate for AJ carrier screening*

|              |           |                   |   |    |                   |      |
|--------------|-----------|-------------------|---|----|-------------------|------|
| ATS-COL4A5   | p.R1677Q  | 1598 <sup>b</sup> | 0 | 0  | 1598 <sup>b</sup> | N/A  |
| HYC1-CCDC88C | p.R312*   | 2238              | 0 | 0  | 2238              | N/A  |
| HHH-SLC25A15 | p.F188del | 2242              | 0 | 0  | 2242              | N/A  |
| JEB-H-LAMB3  | p.N843fs  | 1590              | 0 | 0  | 1590              | N/A  |
|              | p.R42*    | 1590              | 0 | 0  | 1590              | N/A  |
|              | p.R635*   | 1590              | 0 | 3  | 1587              | 0.97 |
|              | p.Q243*   | 1586              | 0 | 0  | 1586              | N/A  |
| LS-NDUFS4    | p.K154fs  | 1594              | 0 | 3  | 1591              | 0.97 |
|              | p.D119H   | 1596              | 0 | 0  | 1596              | N/A  |
| LS-NDUFAF5   | p.G250V   | 1597              | 0 | 0  | 1597              | N/A  |
| SCN3-HAX1    | p.S43fs   | 1596              | 0 | 2  | 1594              | 0.98 |
| PCH1A-VRK1   | p.R358*   | 1595              | 0 | 3  | 1592              | 0.97 |
| GLC3A-CYP1B1 | p.R368H   | 2231              | 2 | 81 | 2148              | 0.18 |
| RP62-MAK     | p.K433fs  | 1494              | 0 | 52 | 1442              | 0.49 |
|              | p.R166H   | 1591              | 0 | 0  | 1591              | N/A  |
| PBD1A-PEX1   | p.G843D   | 2240              | 0 | 0  | 2240              | N/A  |
|              | p.I700fs  | 2243              | 0 | 1  | 2242              | 0.99 |
|              | p.G983fs  | 2236              | 0 | 0  | 2236              | N/A  |

HOM, homozygote; HET, heterozygote; WT, wild-type; CI, confidence interval; HWE, Hardy-Weinberg equilibrium.

<sup>a</sup>See Table 1 for disease abbreviations. <sup>b</sup>899 females and 699 males

Clinical Genetics

Supplementary Table S8: Cumulative risks for AJ panels

| ACMG/ACOG recommendation  |                      | Commercially available additional AJ-9 |                                   | Additional AJ-18 in current study |                                   |
|---------------------------|----------------------|----------------------------------------|-----------------------------------|-----------------------------------|-----------------------------------|
| Disease name <sup>a</sup> | AJ carrier frequency | Disease name                           | AJ carrier frequency <sup>b</sup> | Disease name                      | AJ carrier frequency <sup>b</sup> |
| GD                        | 1 in 15              | GSD1A                                  | 1 in 64                           | SLOS                              | 1 in 40                           |
| CF                        | 1 in 23              | FH                                     | 1 in 68                           | CPT2                              | 1 in 51                           |
| TSD                       | 1 in 27              | WWS                                    | 1 in 90                           | CAMT                              | 1 in 57                           |
| FD                        | 1 in 31              | MSUD lb                                | 1 in 97                           | CDG1A                             | 1 in 61                           |
| CD                        | 1 in 55              | E3                                     | 1 in 108                          | WD                                | 1 in 67                           |
| MLIV                      | 1 in 88              | JBS2                                   | 1 in 110                          | ARPKD                             | 1 in 105                          |
| FANCC                     | 1 in 100             | NM                                     | 1 in 114                          | RP59                              | 1 in 117                          |
| NPD                       | 1 in 115             | USH3A                                  | 1 in 120                          | BBS2                              | 1 in 139                          |
| BS                        | 1 in 133             | USH1F                                  | 1 in 147                          | TYRSN1                            | 1 in 143                          |
|                           |                      |                                        |                                   | GALT                              | 1 in 156                          |
|                           |                      |                                        |                                   | DC                                | 1 in 165                          |
|                           |                      |                                        |                                   | ABL                               | 1 in 185                          |
|                           |                      |                                        |                                   | EDSVIIC                           | 1 in 187                          |
|                           |                      |                                        |                                   | ATS                               | 1 in 192                          |



## Clinical Genetics

|        |          |
|--------|----------|
| PBD5A  | 1 in 227 |
| MSD    | 1 in 279 |
| ARMS   | 1 in 453 |
| PHGDHD | 1 in 453 |

### Combined carrier frequency<sup>c</sup>

|          |           |        |
|----------|-----------|--------|
| 1 in 4.3 | 1 in 10.6 | 1 in 6 |
|----------|-----------|--------|

### Cumulative carrier frequency<sup>c</sup>

**1 in 4.3**

**1 in 3**

**1 in 2**

---

AJ, Ashkenazi Jewish; <sup>a</sup>Additional disease abbreviations: GD, Gaucher Disease (MIM#230800); CF, cystic fibrosis ((MIM#219700); TSD, Tay-Sachs disease (MIM#272800); FD, familial dysautonomia (MIM#223900); CD, Canavan disease (MIM#271900); MLIV, mucopolipidosis IV (MIM#252650); FANCC, Fanconi anemia, complementation group C (MIM#227645); NPD, Niemann-Pick disease type A (MIM#257200);, BS, Bloom syndrome (MIM#210900); GSD1A, glycogen storage disease type 1A (MIM#232200); FH, familial hyperinsulinism (MIM#256450); WWS, Walker-Warburg syndrome (MIM#253800); MSUD, maple syrup urine disease (MIM#248600); E3, dihydrolipoamide dehydrogenase deficiency (MIM#246900); JBS, Joubert syndrome (MIM#608091); NM, Nema line myopathy (MIM#256030); USH3A, Usher syndrome, Type IIIA (MIM#276902); USH1F, Usher syndrome, Type IF (MIM#602083). <sup>b</sup>AJ carrier frequencies for the first two panels were from Scott *et al.* 2010 except for WWS and JBS2, whose AJ carrier frequencies were from unpublished data. <sup>c</sup>Refers to the simple mathematical sum of all disease frequencies in the panel. Proportions of multi-mutation carrier were not considered.

# Clinical Genetics

**Supplementary Table S9: Population frequency comparison between current AJ cohort and literature report**

| Disease | Gene            | Mutation                  | Current AJ cohort |             | Literature        |             | Population Ethnicity | Literature (PMID)              | p-value |
|---------|-----------------|---------------------------|-------------------|-------------|-------------------|-------------|----------------------|--------------------------------|---------|
|         |                 |                           | Carrier frequency | Sample size | Carrier frequency | Sample size |                      |                                |         |
| ABL     | <i>MTTP</i>     | p.G865*                   | 1 in 394          | 3347        | 1 in 113          | 393         | AJ                   | 17275380                       | 0.65    |
| ABL     | <i>MTTP</i>     | p.S738fs                  | 1 in 2954         | 2954        | 0                 | 430         | AJ                   | 17275380                       | 0.70    |
| AS      | <i>COL4A3</i>   | p.L14_L21del              | 1 in 192          | 3639        | 1 in 183          | 2017        | AJ                   | 23927549                       | 0.91    |
| AMRS    | <i>SLC35A3</i>  | p.S296G                   | 1 in 453          | 3622        | 1 in 205          | 2045        | AJ                   | 24031089                       | 0.08    |
| AMRS    | <i>SLC35A3</i>  | p.Q172*                   | 0                 | 3617        | 0                 | 2045        | AJ                   | 24031089                       | 1.00    |
| BBS2    | <i>BBS2</i>     | p.D104A                   | 1 in 363          | 3627        | 1 in 211          | 19010       | AJ                   | 23829372                       | 0.13    |
| BBS2    | <i>BBS2</i>     | p.R632P                   | 1 in 227          | 3626        | 1 in 383          | 18025       | AJ                   | 23829372                       | 0.09    |
| CPT2    | <i>CPT2</i>     | p.S113L                   | 1 in 82           | 3587        | 1 in 35           | 280         | AJ                   | 2013 ACMG meeting abstract 522 | 0.05    |
| CAMT    | <i>MPL</i>      | c.79+2T>A                 | 1 in 57           | 3617        | 1 in 75           | 2018        | AJ                   | 21489838                       | 0.23    |
| CDG1A   | <i>PMM2</i>     | p.R141H                   | 1 in 61           | 3578        | 1 in 40           | 280         | AJ                   | 2013 ACMG meeting abstract 522 | 0.33    |
| GALT    | <i>GALT</i>     | c.-1039_+789del5573ins129 | 1 in 199          | 3582        | 1 in 127          | 760         | AJ                   | 21059483                       | 0.29    |
| HHH     | <i>SLC25A15</i> | p.F188del                 | 0                 | 2242        | 1 in 94           | 280         | AJ                   | 2013 ACMG meeting abstract 522 | <0.01   |
| LS      | <i>NDUFS4</i>   | p.K154fs                  | 1 in 531          | 1594        | 1 in 1000         | 5000        | AJ                   | 19107570                       | 0.41    |
| LS      | <i>NDUFA5</i>   | p.G250V                   | 0                 | 1597        | 1 in 290          | 869         | AJ                   | 21607760                       | 0.04    |
| PHGDHD  | <i>PHGDH</i>    | p.V490M                   | 1 in 453          | 3625        | 1 in 400          | 400         | AJ                   | 11751922                       | 0.61    |
| PCH1A   | <i>VRK1</i>     | p.R358*                   | 1 in 532          | 1595        | 1 in 225          | 449         | AJ                   | 19646678                       | 0.30    |
| GLC3A   | <i>CYP1B1</i>   | p.R368H                   | 1 in 26           | 2231        | 1 in 31           | 280         | AJ                   | 2013 ACMG meeting abstract 522 | 0.83    |
| RP59    | <i>DHDDS</i>    | p.K42E                    | 1 in 117          | 3621        | 1 in 322          | 322         | AJ                   | 21295282                       | 0.51    |
|         |                 |                           |                   |             | 1 in 90           | 717         | AJ                   | 21295283                       | 0.51    |
|         |                 |                           |                   |             | 1 in 120          | 1207        | AJ                   | 22110072                       | 1.00    |
| RP62    | <i>MAK</i>      | p.K433fs                  | 1 in 29           | 1494        | 1 in 55           | 1207        | AJ                   | 22110072                       | <0.01   |
| RP62    | <i>MAK</i>      | p.R166H                   | 0                 | 1591        | 1 in 217          | 217         | Israel oriental Jews | 21835304                       | 0.12    |
| SLOS    | <i>DHCR7</i>    | c.964-1G>C                | 1 in 42           | 3604        | 1 in 35           | 280         | AJ                   | 2013 ACMG meeting abstract 522 | 0.55    |
| SLOS    | <i>DHCR7</i>    | p.W151* (c.452G>A)        | 1 in 1204         | 3612        | 1 in 338          | 7774        | European Caucasians  | 17965227(Euro Caucasians)      | 0.03    |
| WD      | <i>ATP7B</i>    | p.E1064A                  | 1 in 179          | 3572        | 1 in 100          | 100         | AJ                   | 9482578                        | 0.44    |
| PBD5A   | <i>PEX2</i>     | p.R119*                   | 1 in 227          | 3626        | 1 in 123          | 2091        | AJ                   | 23590336                       | 0.10    |
